# Supplementary material
Source: Royal Society of Chemistry journal article supplement (doi:10.1039/d6ob00354k)
Supplement: d6ob00354k1.pdf [file d6ob00354k1.pdf]

## Supporting Information

for

### Unexpected pyrazine ring annulation in the Cu-catalyzed reaction of aryl bromides with 1,2-diamines. Synthesis of novel pyrazino[2,3-*f*]perimidine fluorophores

Andrey L. Dyatlov,<sup>[a]</sup> Ekaterina A. Filatova,<sup>[a]</sup> Aleksandr A. Shcherbatykh,<sup>[a]</sup> Oleg P. Demidov,<sup>[b]</sup>  
Anna V. Gulevskaya\*<sup>[a]</sup>

<sup>[a]</sup> Department of Chemistry, Southern Federal University, Zorge str. 7, 344090 Rostov-on-Don Russian Federation.  
E-mail: [agulevskaya@sfedu.ru](mailto:agulevskaya@sfedu.ru)

<sup>[b]</sup> Department of Chemistry and Pharmacy, North Caucasus Federal University, Pushkin str. 1a, 355017 Stavropol, Russian Federation

### Experimental details, copies of NMR spectra, photophysical studies

#### Table of Contents

|                                              |    |
|----------------------------------------------|----|
| Experimental Section.....                    | 2  |
| Copies of NMR spectra (Figures S1–S26).....  | 5  |
| Photophysical studies (Figures S27–S31)..... | 20 |
| References .....                             | 22 |

## EXPERIMENTAL SECTION

**General Information:**  $^1\text{H}$  and  $^{13}\text{C}$  NMR spectra were recorded on 250 MHz spectrometers. Chemical shifts are reported in ppm relative to  $\text{Me}_4\text{Si}$ . The UV-vis spectra were recorded on a Varian Cary 50 Probe spectrophotometer. Fluorescence emission spectra were collected using a Cary Eclipse Varian spectrofluorometer. Mass spectra were performed in electrospray ionization (ESI) modes (HR-ESI MS). Melting points were determined in glass capillaries and are uncorrected. X-ray measurements were conducted with diffractometer SyperNova, Dual, Cu at home/near, AtlasS2'. Atomic coordinates, bond lengths, bond angles and thermal parameters have been deposited at the Cambridge Crystallographic Data Centre (CCDC): CCDC 2528976 (**3b**), CCDC 2528980 (**4a**). These data can be obtained free of charge from Cambridge Crystallographic Data Centre.

Starting 6-bromo-1,3-dimethyl-1*H*-perimidin-2(3*H*)-one **1**<sup>[1]</sup> was synthesized as it was described earlier.

**General procedure for arylation of NH-heterocycles with 6-bromo-1,3-dimethyl-1*H*-perimidin-2(3*H*)-one **1** (Table 1).** A mixture of 6-bromo-1,3-dimethyl-1*H*-perimidin-2(3*H*)-one **1** (116 mg, 0.4 mmol), NH-heterocycle **2** (0.48 mmol), CuI (30 mg, 0.16 mmol, 40 mol%), diamine ligand (0.32 mmol, 80 mol%),  $\text{K}_3\text{PO}_4$  (170 mg, 0.8 mmol) and 3 mL *o*-xylene or DMF was flushed with argon and stirred at 120 °C for 72 h. The reaction mixture was evaporated to dryness on air. The residue was purified by column chromatography on silica using dichloromethane as eluent. The colorless fraction with  $R_f$  0.4 gave N-arylation product **3**. From the next colorless fraction with  $R_f$  0.3 a mixture of starting compound **1** and 1,3-dimethyl-1*H*-perimidin-2(3*H*)-one **5** were isolated. Elution was then continued using a mixture of  $\text{CH}_2\text{Cl}_2$ -EtOAc (10:1, v/v) as the eluent. The yellow fluorescent under UV fraction with  $R_f$  0.2 ( $\text{CH}_2\text{Cl}_2$ -EtOAc (10:1, v/v)) gave 4,6-dimethyl-4*H*-pyrazino[2,3-*f*]perimidin-5(6*H*)-one **4a** or 4,6-dimethyl-9,10,11,12-tetrahydro-4*H*-quinazolino[5,4-*ab*]phenazin-5(6*H*)-one **4b**.

6-(1*H*-Indol-1-yl)-1,3-dimethyl-1*H*-perimidin-2(3*H*)-one **3a** was obtained as white crystals with mp 265-268 °C.  $^1\text{H}$  NMR (250 MHz,  $\text{CDCl}_3$ ):  $\delta$  = 7.75 (dd,  $J$  = 6.4, 2.4 Hz, 1 H), 7.49 (d,  $J$  = 8.1 Hz, 1 H), 7.29-7.36 (m, 2 H), 7.12-7.22 (m, 2 H), 6.99-7.03 (m, 1 H), 6.82 (d,  $J$  = 8.5 Hz, 1 H), 6.75 (d,  $J$  = 3.1 Hz, 1 H), 6.67-6.71 (m, 2 H), 3.55 (s, 3 H), 3.52 ppm (s, 3 H).  $^{13}\text{C}$  NMR (62.9 MHz,  $\text{CDCl}_3$ ):  $\delta$  = 150.8, 138.0, 137.8, 131.6, 129.5, 128.9, 128.4, 128.0, 127.3, 122.1, 121.0, 120.1, 115.3, 114.9, 110.7, 105.0, 103.5, 102.8, 31.0 ppm. HRMS (ESI):  $m/z$  calcd. for  $\text{C}_{21}\text{H}_{17}\text{N}_3\text{NaO}$  [ $\text{M} + \text{Na}$ ]<sup>+</sup>: 350.1264, found 350.1277.

6-(9*H*-Carbazol-9-yl)-1,3-dimethyl-1*H*-perimidin-2(3*H*)-one **3b** was obtained as white crystals with mp 281-283 °C.  $^1\text{H}$  NMR (250 MHz,  $\text{CDCl}_3$ ):  $\delta$  = 8.19-8.23 (m, 2 H), 7.57 (d,  $J$  = 8.1 Hz, 1 H), 7.21-7.37 (m, 5 H), 7.02 (dd,  $J$  = 7.2, 1.1 Hz, 2 H), 6.77 (d,  $J$  = 8.2 Hz, 1H), 6.66 (t,  $J$  = 7.4 Hz, 2 H), 3.58 (s, 3 H), 3.53 ppm (s, 3 H).  $^{13}\text{C}$  NMR (62.9 MHz,  $\text{CDCl}_3$ ):  $\delta$  = 150.8, 141.9, 138.4, 138.2, 131.8, 128.9, 125.9, 125.6, 123.2, 120.4, 119.7, 115.7, 115.1, 110.1, 105.1, 104.0, 31.02, 30.98 ppm. HRMS (ESI):  $m/z$  calcd. for  $\text{C}_{25}\text{H}_{19}\text{N}_3\text{NaO}$  [ $\text{M} + \text{Na}$ ]<sup>+</sup>: 400.1420, found 400.1429.

4,6-Dimethyl-4*H*-pyrazino[2,3-*f*]perimidin-5(6*H*)-one **4a** was obtained as yellow crystals with mp 239-240 °C.  $^1\text{H}$  NMR (250 MHz,  $\text{CDCl}_3$ ):  $\delta$  = 8.76 (d,  $J$  = 2.0 Hz, 1H), 8.69-8.73 (m, 2 H), 7.73 (t,  $J$  = 8.1 Hz, 1 H), 7.05 (dd,  $J$  = 8.0, 0.6 Hz, 1 H), 6.95 (s, 1 H), 3.58 (s, 3 H), 3.55 ppm (s, 3H).  $^{13}\text{C}$  NMR (62.9 MHz,  $\text{CDCl}_3$ ):  $\delta$  = 150.3, 145.1, 144.7, 140.8, 140.0, 137.6, 137.3, 131.6, 129.6, 117.4, 114.6, 109.9, 101.4, 31.2, 31.0 ppm. HRMS (ESI):  $m/z$  calcd. for  $\text{C}_{15}\text{H}_{13}\text{N}_4\text{O}$  [ $\text{M} + \text{H}$ ]<sup>+</sup> 265.1084, found 265.1075;  $m/z$  calcd. for  $\text{C}_{15}\text{H}_{12}\text{N}_4\text{NaO}$  [ $\text{M} + \text{Na}$ ]<sup>+</sup> 287.0903, found 287.0903.

4,6-Dimethyl-9,10,11,12-tetrahydro-4*H*-quinazolino[5,4-*ab*]phenazin-5(6*H*)-one **4b** was obtained as yellow crystals with mp 221-222 °C.  $^1\text{H}$  NMR (250 MHz,  $\text{CDCl}_3$ ):  $\delta$  = 8.57 (d,  $J$  = 7.6 Hz, 1 H), 7.59 (t,  $J$  = 8.0 Hz, 1 H), 6.88 (d,  $J$  = 7.4 Hz, 1H), 6.75 (br s, 1 H), 3.48 (s, 3 H), 3.47 (s, 3 H), 3.11-3.16 (m, 4 H), 2.01-2.06 ppm (m, 4 H).  $^{13}\text{C}$  NMR (62.9 MHz,  $\text{CDCl}_3$ ):  $\delta$  = 153.8, 150.3, 149.8, 142.1, 138.7, 137.2, 135.0, 131.3, 129.0, 116.9, 114.2, 108.9, 101.1, 32.80, 32.78, 31.1, 30.8, 23.0, 22.9. HRMS (ESI):  $m/z$  calcd. for  $\text{C}_{19}\text{H}_{19}\text{N}_4\text{O}$  [ $\text{M} + \text{H}$ ]<sup>+</sup> 319.1553, found 319.1558.

Isolated *1,3-dimethyl-1H-perimidin-2(3H)-one* **5** was identical to authentic material<sup>[2]</sup>.

**General procedure for Cu-catalyzed reaction of 6-bromo-1,3-dimethyl-1H-perimidin-2(3H)-one with various 1,2-diamines (Tables 2,3).** A mixture of 6-bromo-1,3-dimethyl-1H-perimidin-2(3H)-one **1** (116 mg, 0.4 mmol), diamine (0.8 mmol), CuBr (57 mg, 0.4 mmol), K<sub>2</sub>CO<sub>3</sub> (221 mg, 1.6 mmol) and 2 mL DMSO was flushed with argon and stirred at 120 °C for 48 h. The reaction mixture was then evaporated to dryness on air. The residue was purified by column chromatography on Al<sub>2</sub>O<sub>3</sub> using a mixture CH<sub>2</sub>Cl<sub>2</sub>–petroleum ether (1:1, v/v) as eluent. From the colorless fraction with R<sub>f</sub> 0.4 starting compound **1** was regenerated. Next colorless fraction with R<sub>f</sub> 0.3 gave *1,3-dimethyl-1H-perimidin-2(3H)-one* **5**. The yellow fluorescent under UV fraction with R<sub>f</sub> 0.1-0.2 gave compound **4**.

Inseparable mixture of *4,6,9-trimethyl-4H-pyrazino[2,3-f]perimidin-5(6H)-one* **4c** and *4,6,10-trimethyl-4H-pyrazino[2,3-f]perimidin-5(6H)-one* **4c'** (2:1 ratio) was obtained as a yellow solid (for <sup>1</sup>H NMR spectrum see Fig. S9). HRMS (ESI): *m/z* calcd. for C<sub>16</sub>H<sub>15</sub>N<sub>4</sub>O [M + H]<sup>+</sup> 279.1240, found 279.1237.

*4,6-Dimethyl-4H-quinazolino[5,4-ab]phenazin-5(6H)-one* **4d** was obtained as orange crystals with mp 256-258 °C. <sup>1</sup>H NMR (250 MHz, CDCl<sub>3</sub>): δ = 8.85 (d, *J* = 8.0 Hz, 1 H), 8.18 (dd, *J* = 8.2, 1.4 Hz, 1 H), 8.04-8.09 (m, 1 H), 7.67-7.82 (m, 3 H), 7.06 (d, *J* = 7.9 Hz, 1 H), 6.83 (s, 1 H), 3.54 (s, 3 H), 3.50 ppm (s, 3 H). <sup>13</sup>C NMR (62.9 MHz, CDCl<sub>3</sub>): δ = 150.0, 145.2, 143.5, 140.8, 140.7, 139.5, 137.2, 131.4, 130.4, 129.9, 129.6, 128.4, 128.1, 118.9, 114.3, 111.8, 100.6, 31.3, 31.0 ppm. HRMS (ESI): *m/z* calcd. for C<sub>19</sub>H<sub>15</sub>N<sub>4</sub>O [M + H]<sup>+</sup> 315.1240, found 315.1245; *m/z* calcd. for C<sub>19</sub>H<sub>14</sub>N<sub>4</sub>NaO [M + Na]<sup>+</sup> 337.1060, found 337.1061.

*4,6-Dimethyl-4H-benzo[h]quinazolino[5,4-ab]phenazin-5(6H)-one* **4e** was obtained as orange crystals with mp >285 °C (decomp.). <sup>1</sup>H NMR (250 MHz, CDCl<sub>3</sub>): δ = 9.32-9.36 (m, 1 H), 8.94 (d, *J* = 8.2 Hz, 1 H), 7.92-8.06 (m, 3 H), 7.74-7.81 (m, 3 H), 7.11 (s, 1 H), 7.07 (d, *J* = 7.9 Hz, 1 H), 3.65 (s, 3 H), 3.53 ppm (s, 3 H). <sup>13</sup>C NMR (62.9 MHz, CDCl<sub>3</sub>): δ = 150.3, 143.6, 142.2, 140.3, 138.2, 137.4, 133.6, 131.5, 130.6, 129.7, 129.3, 128.1, 127.4, 127.3, 125.0, 118.4, 114.5, 111.0, 101.5, 31.4, 31.0 ppm. HRMS (ESI): *m/z* calcd. for C<sub>23</sub>H<sub>17</sub>N<sub>4</sub>O [M + H]<sup>+</sup> 365.1397, found 365.1388.

Isolated *1,3-dimethyl-1H-perimidin-2(3H)-one* **5** was identical to authentic material<sup>[2]</sup>.

**General procedure for Cu-catalyzed reactions of 4-bromo-*N*<sup>1</sup>,*N*<sup>1</sup>,*N*<sup>8</sup>,*N*<sup>8</sup>-tetramethylnaphthalene-1,8-diamine **7** and 4-bromo-*N,N*-dimethylaniline **8** with ethylenediamine.** A mixture of arylbromide (0.5 mmol), ethylenediamine (0.07 mL, 1 mmol), Cu(OAc)<sub>2</sub>·H<sub>2</sub>O (116 mg, 0.5 mmol), K<sub>2</sub>CO<sub>3</sub> (276 mg, 2 mmol) and 2 mL DMSO was flushed with argon and stirred at 120 °C for 48 h. The reaction mixture was then evaporated to dryness on air. The residue was purified by column chromatography.

*N<sup>6</sup>,N<sup>6</sup>,N<sup>7</sup>,N<sup>7</sup>-Tetramethylbenzo[ff]quinoxaline-6,7-diamine* **9** was obtained from compound **7** as a yellow oil. Column chromatography was carried out on Al<sub>2</sub>O<sub>3</sub> using a mixture EtOAc–petroleum ether (1:10, v/v) as eluent. From the colorless fraction with R<sub>f</sub> 0.6 starting compound **7** was regenerated. Compound **9** was isolated from the fraction with R<sub>f</sub> 0.4. <sup>1</sup>H NMR (250 MHz, CDCl<sub>3</sub>): δ = 8.82 (dd, *J* = 8.0, 1.2 Hz, 1 H), 8.68 (d, *J* = 2.2 Hz, 1 H), 8.60 (d, *J* = 2.2 Hz, 1 H), 7.60 (t, *J* = 7.9 Hz, 1 H), 7.24 (dd, *J* = 7.8, 1.1 Hz, 1 H), 7.18 (s, 1 H), 2.92 (s, 6 H), 2.85 ppm (s, 6 H). <sup>13</sup>C NMR (62.9 MHz, CDCl<sub>3</sub>): δ = 152.7, 151.0, 144.4, 144.2, 139.4, 139.0, 134.8, 127.5, 120.7, 117.1, 116.7, 107.6, 44.0, 43.3 ppm. HRMS (ESI): *m/z* calcd. for C<sub>16</sub>H<sub>19</sub>N<sub>4</sub> [M + H]<sup>+</sup> 267.1604, found 267.1609.

*N,N-Dimethylquinoxalin-6-amine* **10** was obtained from compound **8** as a yellow oil (mp 32-34 °C<sup>[3,4]</sup>). Column chromatography was carried out on Al<sub>2</sub>O<sub>3</sub> using a mixture CH<sub>2</sub>Cl<sub>2</sub>–petroleum ether (1:1, v/v) as eluent. Compound **10** was isolated from the fraction with R<sub>f</sub> 0.1. <sup>1</sup>H NMR (250 MHz, CDCl<sub>3</sub>): δ = 8.68 (br s, 1 H), 8.54 (br s, 1 H), 7.94 (d, *J* = 9.4 Hz, 1 H), 7.42 (dd, *J* = 9.4, 2.7 Hz, 1 H), 7.09 (d, *J* = 2.7 Hz, 1 H), 3.17 ppm (s, 6 H). <sup>13</sup>C NMR (62.9 MHz, CDCl<sub>3</sub>): δ = 151.1,

145.1, 145.0, 140.4, 137.1, 129.8, 119.6, 105.5, 40.5 ppm. HRMS (ESI):  $m/z$  calcd. for  $C_{10}H_{12}N_3$   $[M + H]^+$  174.1026, found 174.1026.

**Cu-Catalyzed reactions of 1-bromonaphthalene 11 with ethylenediamine.** A mixture of 1-bromonaphthalene **11** (0.21 mL, 1.5 mmol), ethylenediamine (0.20 mL, 3 mmol), CuBr (216 mg, 1.5 mmol),  $K_2CO_3$  (818 mg, 6 mmol) and 4 mL DMSO was flushed with argon and stirred at 130 °C for 48 h. The reaction mixture was then evaporated to dryness on air. The residue was purified by column chromatography on  $Al_2O_3$  using a mixture  $CH_2Cl_2$ –petroleum ether (1:1, v/v) as eluent. The first fraction with  $R_f$  0.7 gave  $N^1,N^2$ -di(naphthalen-1-yl)ethane-1,2-diamine **13**.

$N^1,N^2$ -Di(naphthalen-1-yl)ethane-1,2-diamine **13** was obtained as a beige crystals with mp 119–121 °C (122–124 °C [5,6]).  $^1H$  NMR (250 MHz,  $CDCl_3$ ):  $\delta$  = 7.80–7.85 (m, 4 H), 7.33–7.51 (m, 8 H), 6.77 (dd,  $J$  = 7.4, 0.9 Hz, 2 H), 4.72 (br. s, 2 H), 3.74 ppm (s, 4 H).  $^{13}C$  NMR (62.9 MHz,  $CDCl_3$ ):  $\delta$  = 143.3, 134.4, 128.7, 126.6, 125.9, 125.0, 123.8, 120.0, 118.2, 104.9, 43.5 ppm. HRMS (ESI):  $m/z$  calcd. For  $C_{22}H_{21}N_2$   $[M + H]^+$  313.1699, found 313.1701.

**Cu-Catalyzed reactions of 4-bromo-*N*-butyl-1,8-naphthalimide 12 with ethylenediamine.** A mixture of 4-bromo-*N*-butyl-1,8-naphthalimide **12** (100 mg, 0.3 mmol), ethylenediamine (0.04 mL, 0.6 mmol), CuBr (43 mg, 0.3 mmol),  $K_2CO_3$  (166 mg, 1.2 mmol) and 2 mL DMSO was flushed with argon and stirred at 130 °C for 48 h. The reaction mixture was then evaporated to dryness on air. The residue was purified by column chromatography on  $Al_2O_3$  using a mixture  $CH_2Cl_2$ –petroleum ether (1:1, v/v). The first fraction with  $R_f$  0.7 gave *N*-butyl-1,8-naphthalimide **15** (10 mg, 13%). Subsequent elution was carried out using a mixture  $CH_2Cl_2$ –EtOAc (3:1, v/v). Fraction with  $R_f$  0.2 gave 4,4'-(ethane-1,2-diylbis(azanediyl))bis(*N*-butyl-1,8-naphthalimide) **14** (43 mg, 51%).

4,4'-(Ethane-1,2-diylbis(azanediyl))bis(*N*-butyl-1,8-naphthalimide) **14** was obtained as yellow crystals with mp 281–283 °C.  $^1H$  NMR (250 MHz,  $DMSO-d_6$ ):  $\delta$  = 8.59 (d,  $J$  = 8.4 Hz, 2 H), 8.41 (d,  $J$  = 7.2 Hz, 2 H), 8.24 (d,  $J$  = 8.5 Hz, 2 H), 7.63 (t,  $J$  = 7.9 Hz, 2 H), 7.51 (br s, 2 H), 6.89 (d,  $J$  = 8.5 Hz, 2 H), 4.03 (t,  $J$  = 7.2 Hz, 4 H), 3.79–3.81 (m, 4 H), 1.56–1.68 (m, 4 H), 1.27–1.42 (m, 4 H), 0.92 ppm (t,  $J$  = 7.3 Hz, 6 H).  $^{13}C$  NMR (62.9 MHz,  $CF_3COOD$ ):  $\delta$  = 168.4, 166.0, 144.4, 134.7, 133.8, 129.5, 127.6, 127.5, 122.2, 122.0, 115.8, 45.0, 41.7, 29.6, 19.7, 12.0 ppm. HRMS (ESI):  $m/z$  calcd. for  $C_{34}H_{34}N_4O_4Na$ ,  $[M + Na]^+$  585.2472, found 585.2390;  $m/z$  calcd. for  $C_{34}H_{32}D_2N_4O_4Na$ ,  $[M + Na]^+$  587.2598, found 587.2552.

Isolated *N*-butyl-1,8-naphthalimide **15** was identical to authentic material<sup>[7]</sup>.

**4,6,8-Trimethyl-5-oxo-5,6-dihydro-4*H*-pyrazino[2,3-*f*]perimidin-8-ium iodide 16.** To a solution of 4,6-dimethyl-4*H*-pyrazino[2,3-*f*]perimidin-5(6*H*)-one **4a** (26 mg, 0.1 mmol) in dichloromethane (4 mL) methyl iodide (0.07 mL, 1 mmol) was added. The reaction mixture was stirred at 35–40 °C for 48 h and then evaporated to dryness. The residue was rinsed with small portion of dichloromethane yielding **16** (20 mg, 49%). Compound **16** was obtained as a red solid with mp 233–235 °C.  $^1H$  NMR (250 MHz,  $DMSO-d_6$ ):  $\delta$  = 9.14 (d,  $J$  = 3.5 Hz, 1 H), 9.10 (d,  $J$  = 3.5 Hz, 1 H), 8.67 (d,  $J$  = 8.1 Hz, 1 H), 8.04 (t,  $J$  = 8.2 Hz, 1 H), 7.58 (d,  $J$  = 8.1 Hz, 1 H), 6.94 (s, 1 H), 4.50 (s, 3 H), 3.64 (s, 3 H), 3.53 ppm (s, 3 H).  $^{13}C$  NMR (62.9 MHz,  $DMSO-d_6$ ):  $\delta$  = 149.3, 147.2, 142.6, 140.3, 138.3, 138.3, 137.0, 133.3, 129.3, 118.0, 114.4, 113.8, 90.7, 45.7, 32.6, 31.9 ppm. HRMS (ESI):  $m/z$  calcd. for  $C_{16}H_{15}N_4O$ ,  $[M + H]^+$  279.1240, found 279.1248.



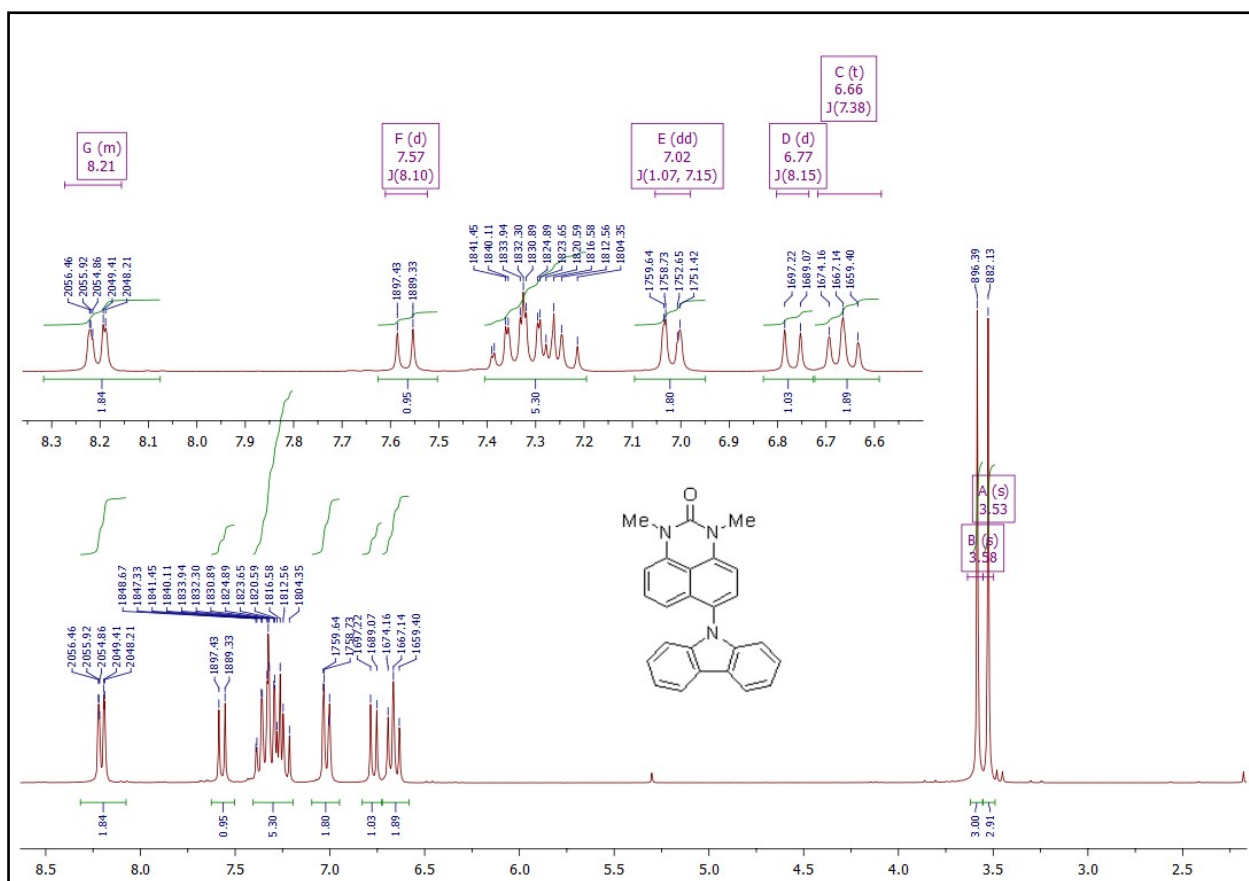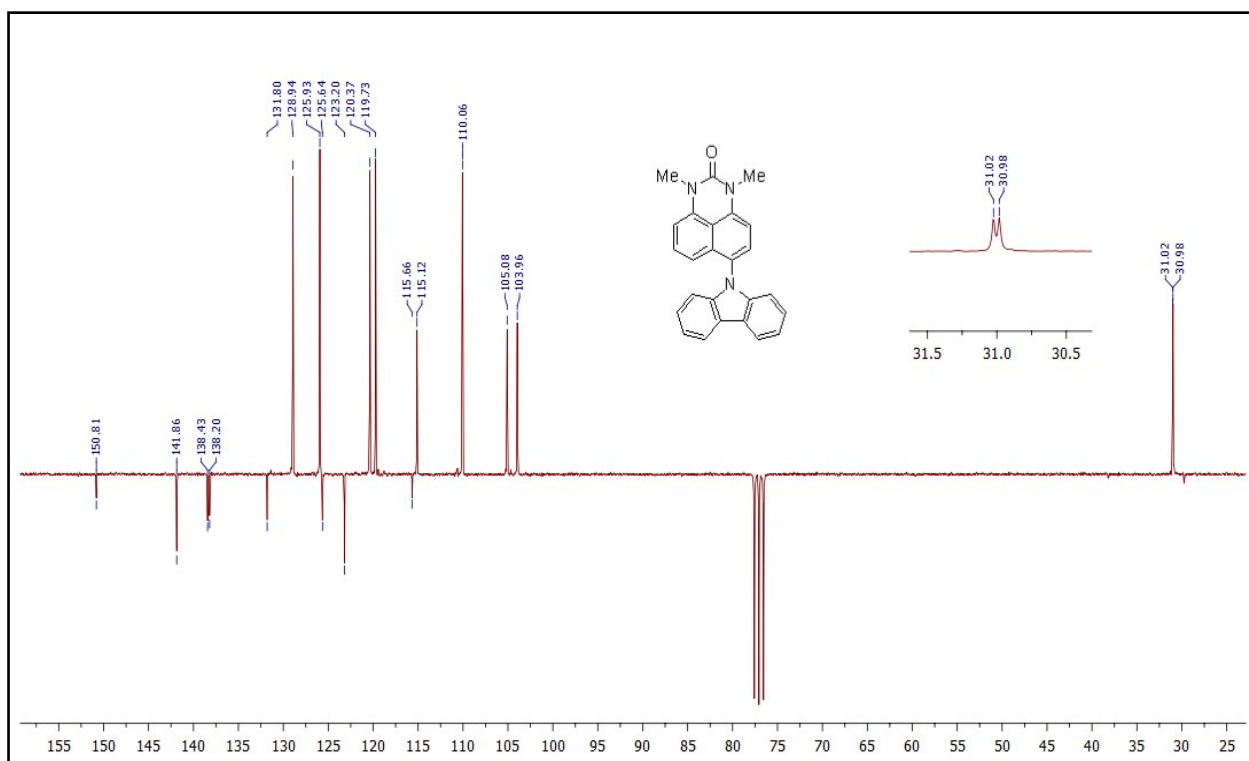

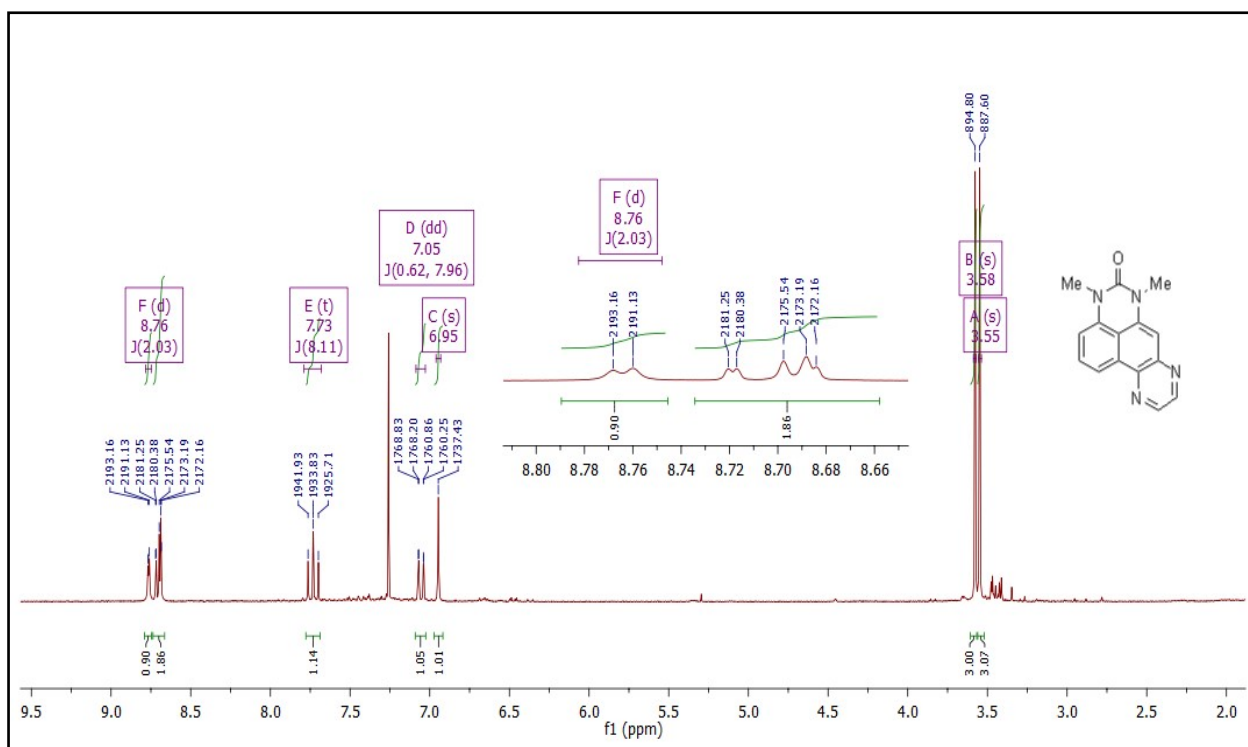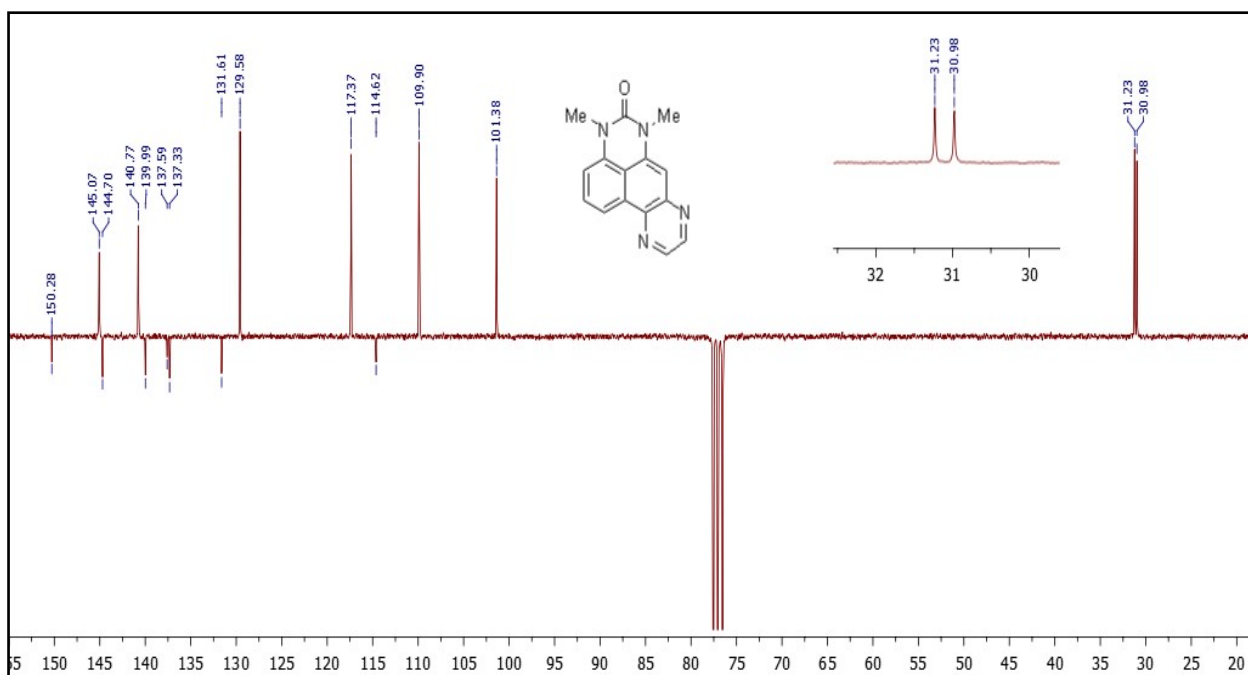

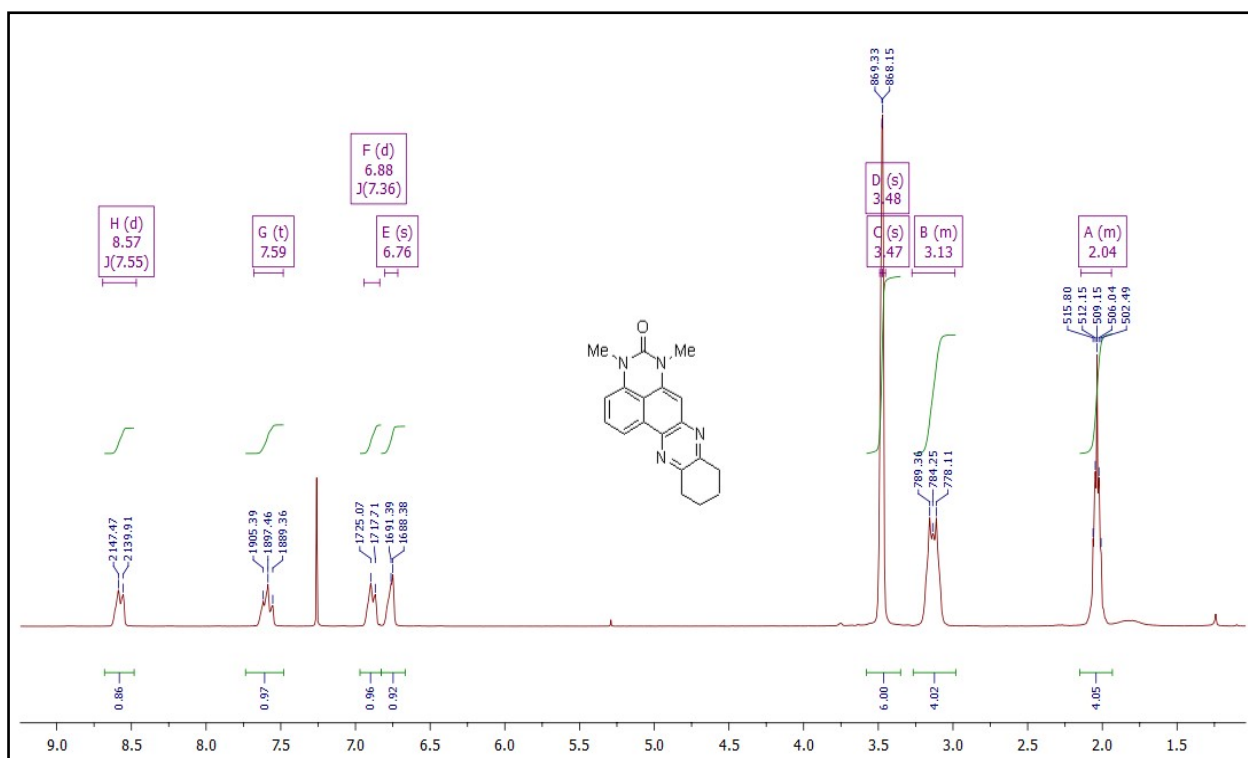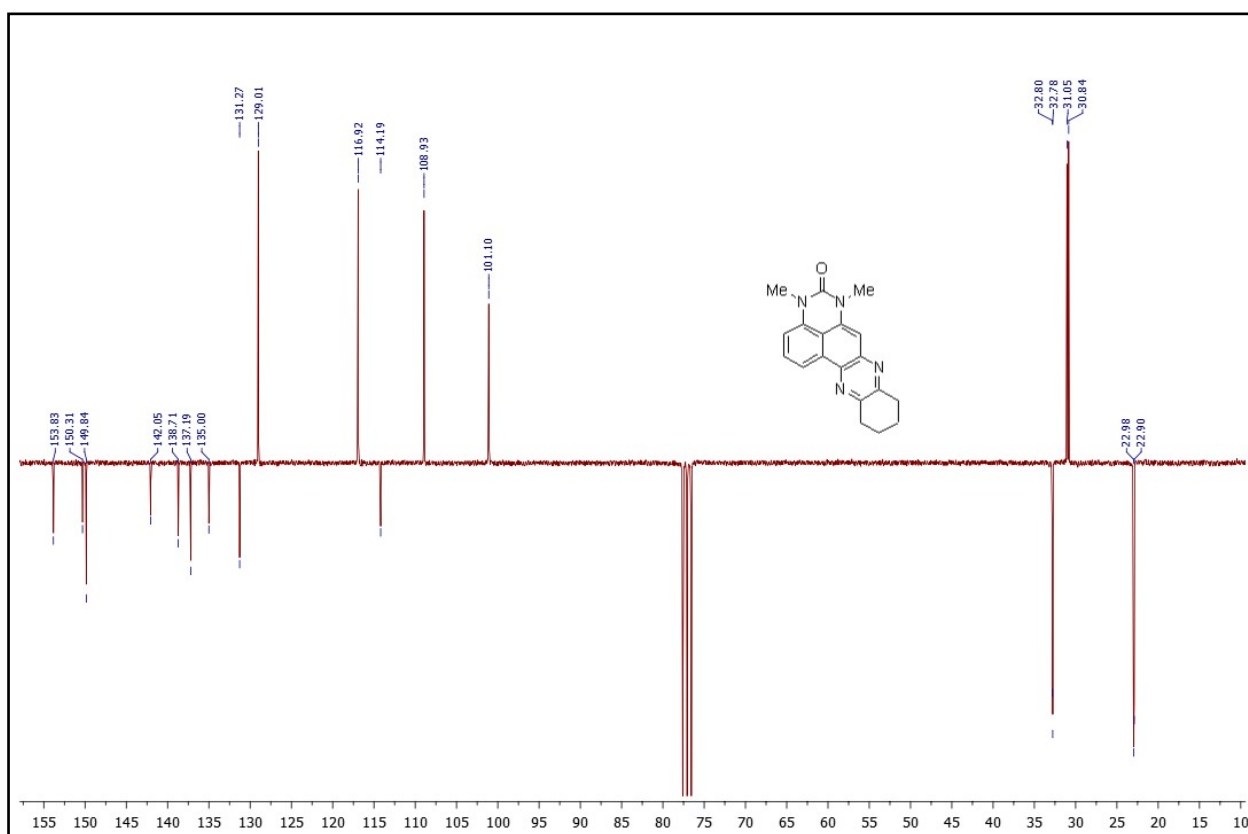

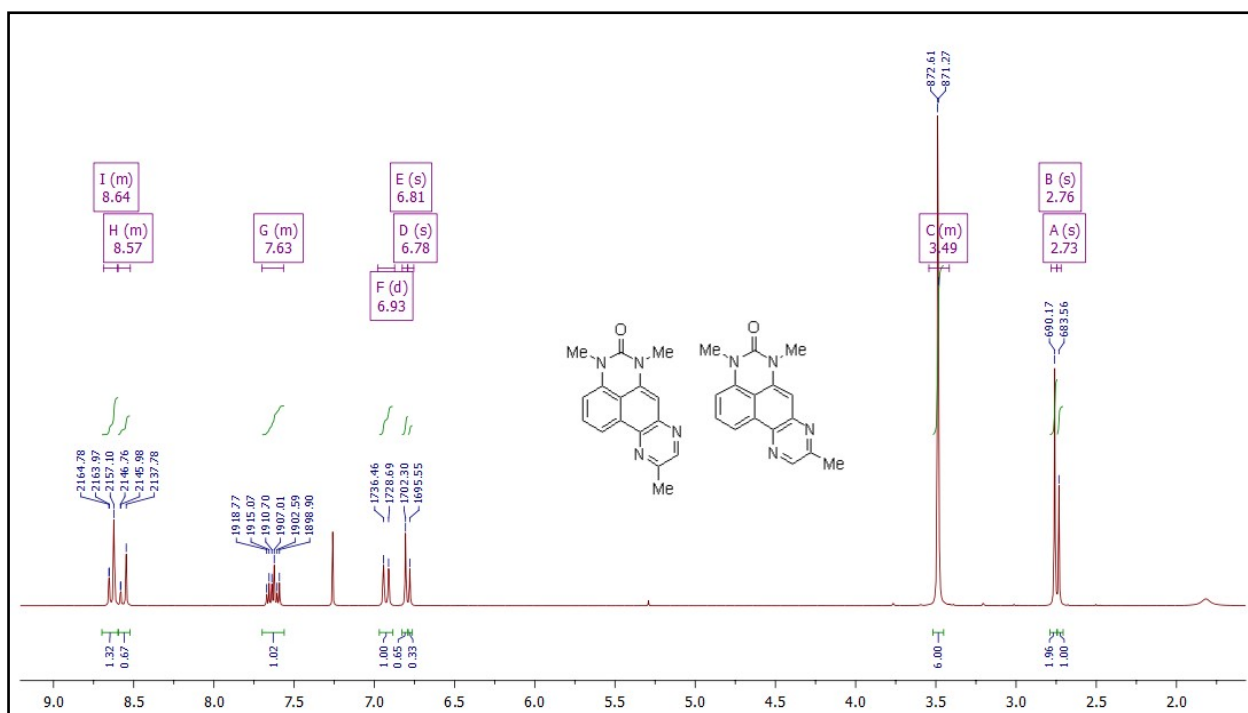

**Fig. S9.** <sup>1</sup>H NMR spectrum of a mixture of isomeric compounds **4c** and **4c'** (250 MHz, CDCl<sub>3</sub>).

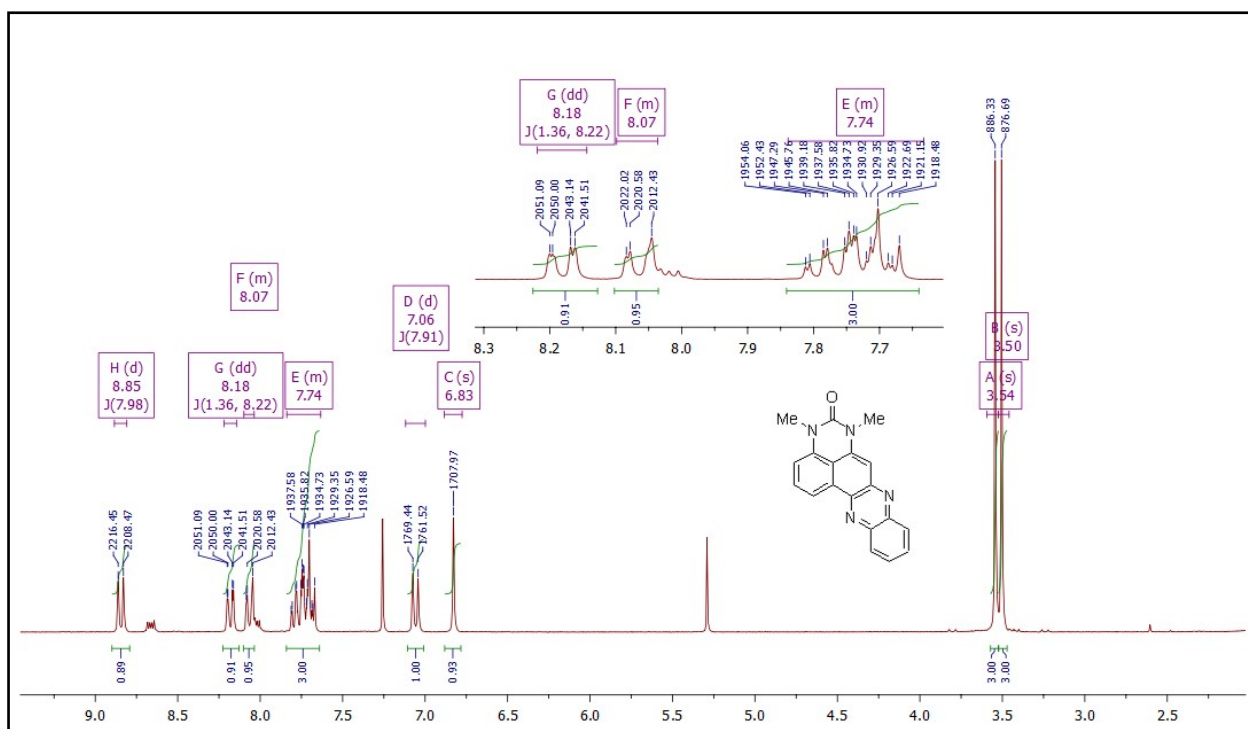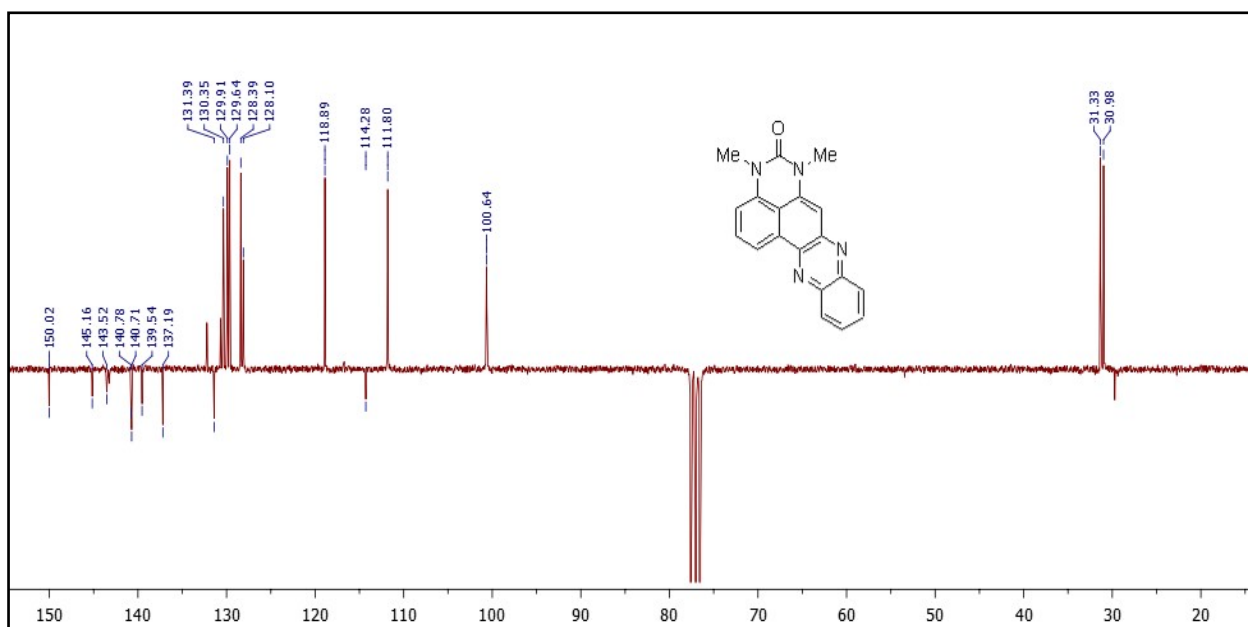

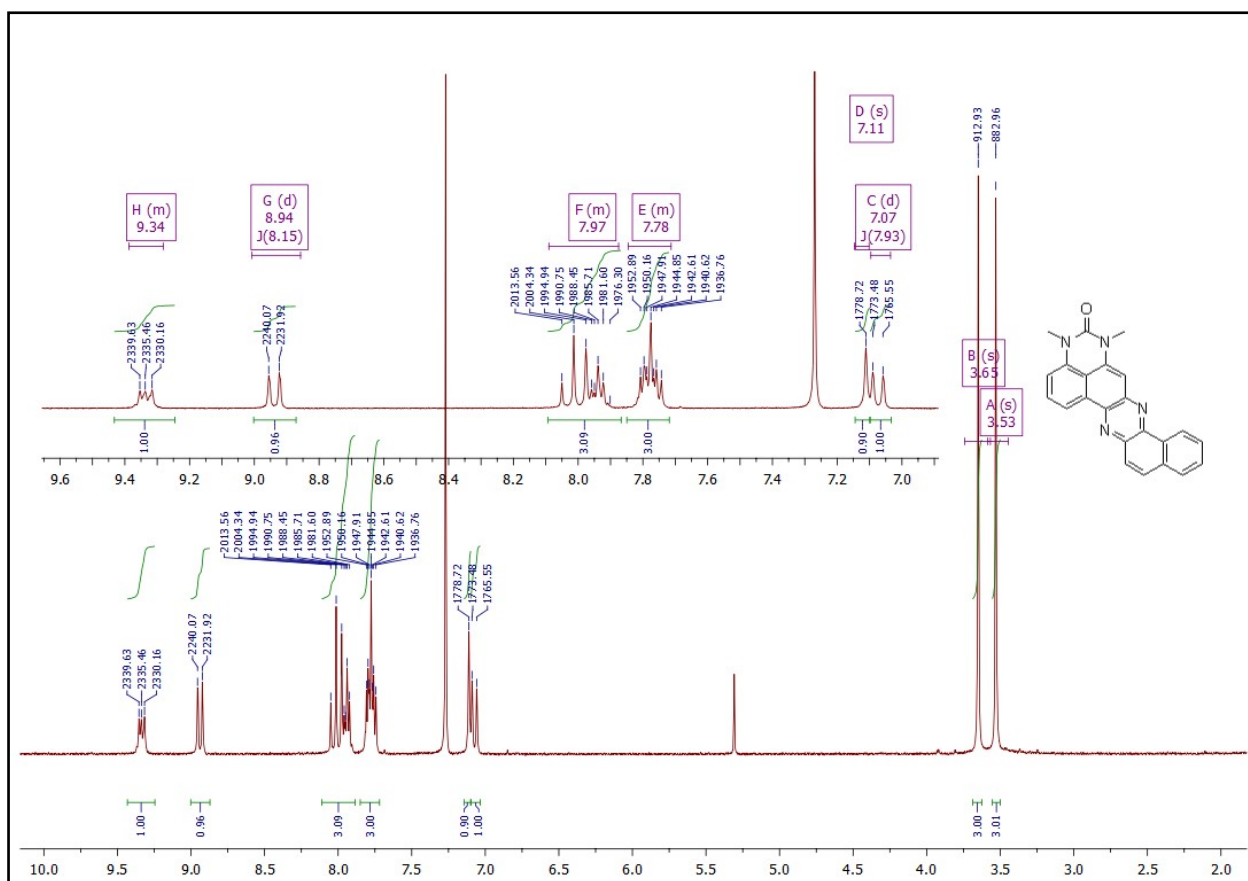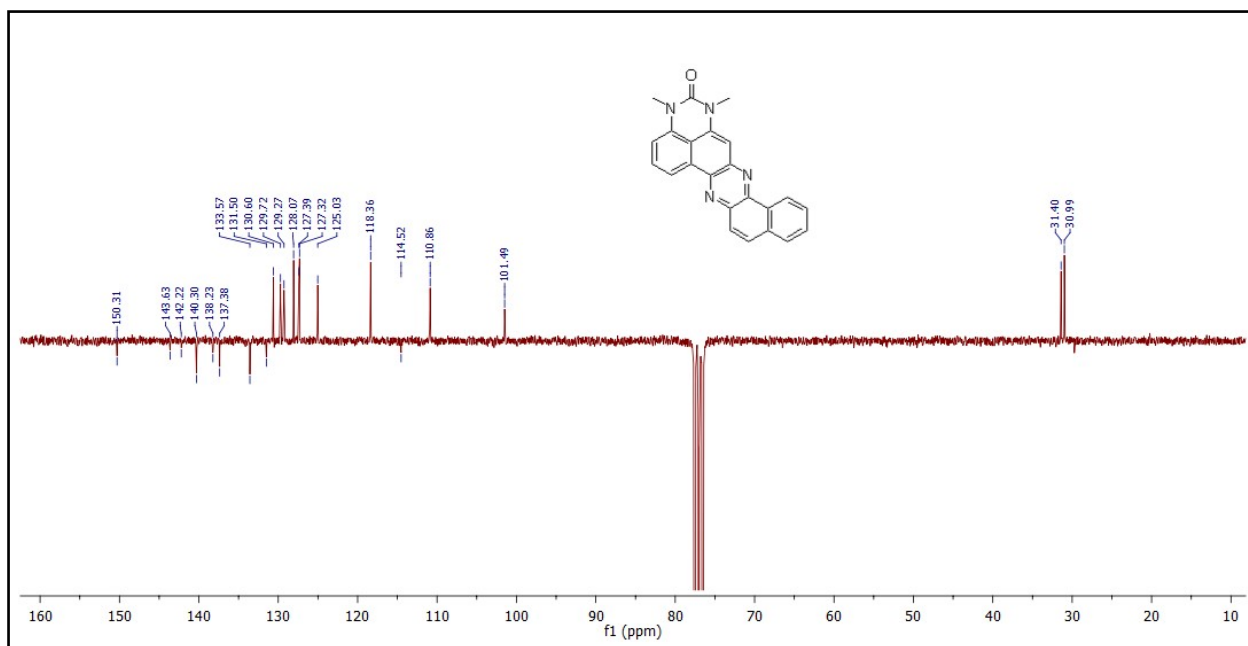

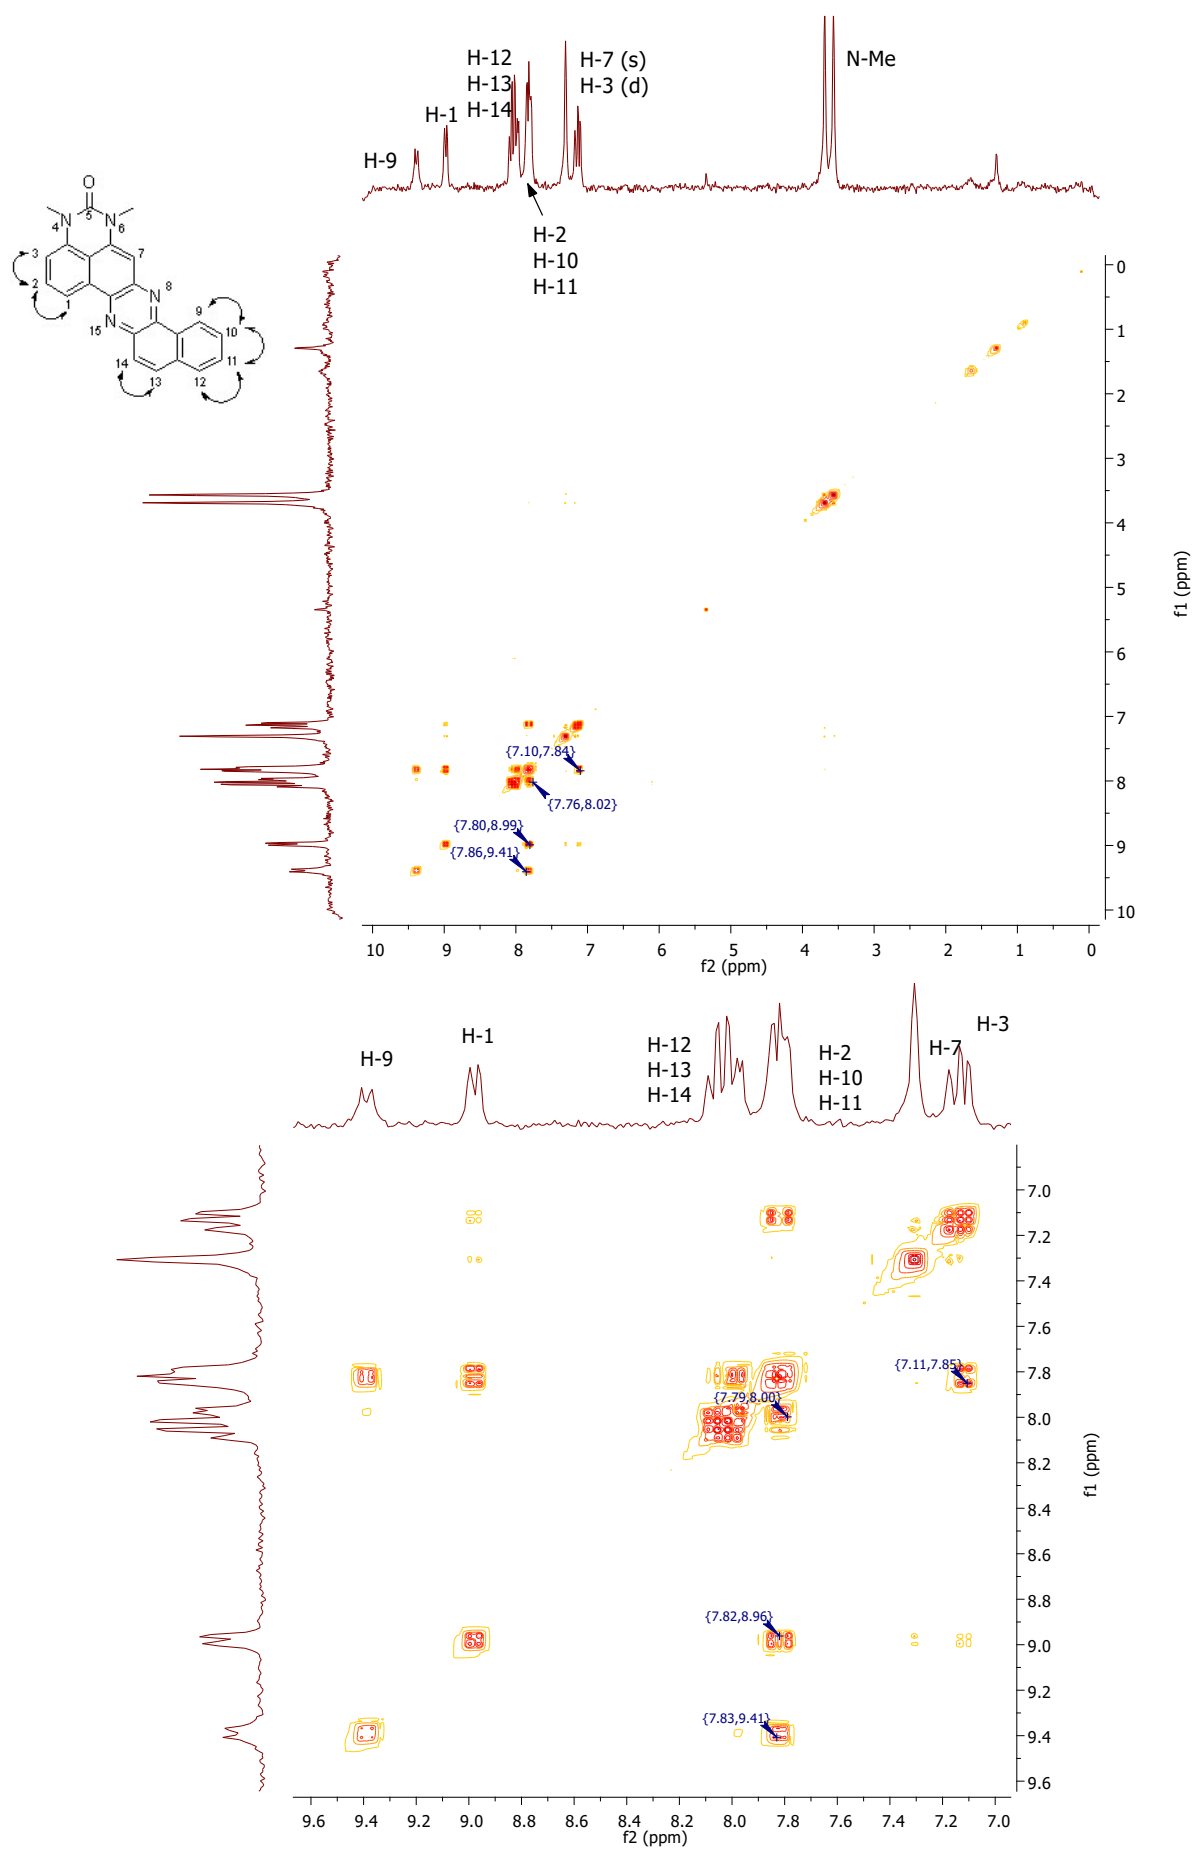

**Fig. S14.**  $^1\text{H}$ - $^1\text{H}$  COSY spectrum of compound **4e** (250 MHz,  $\text{CDCl}_3$ ).

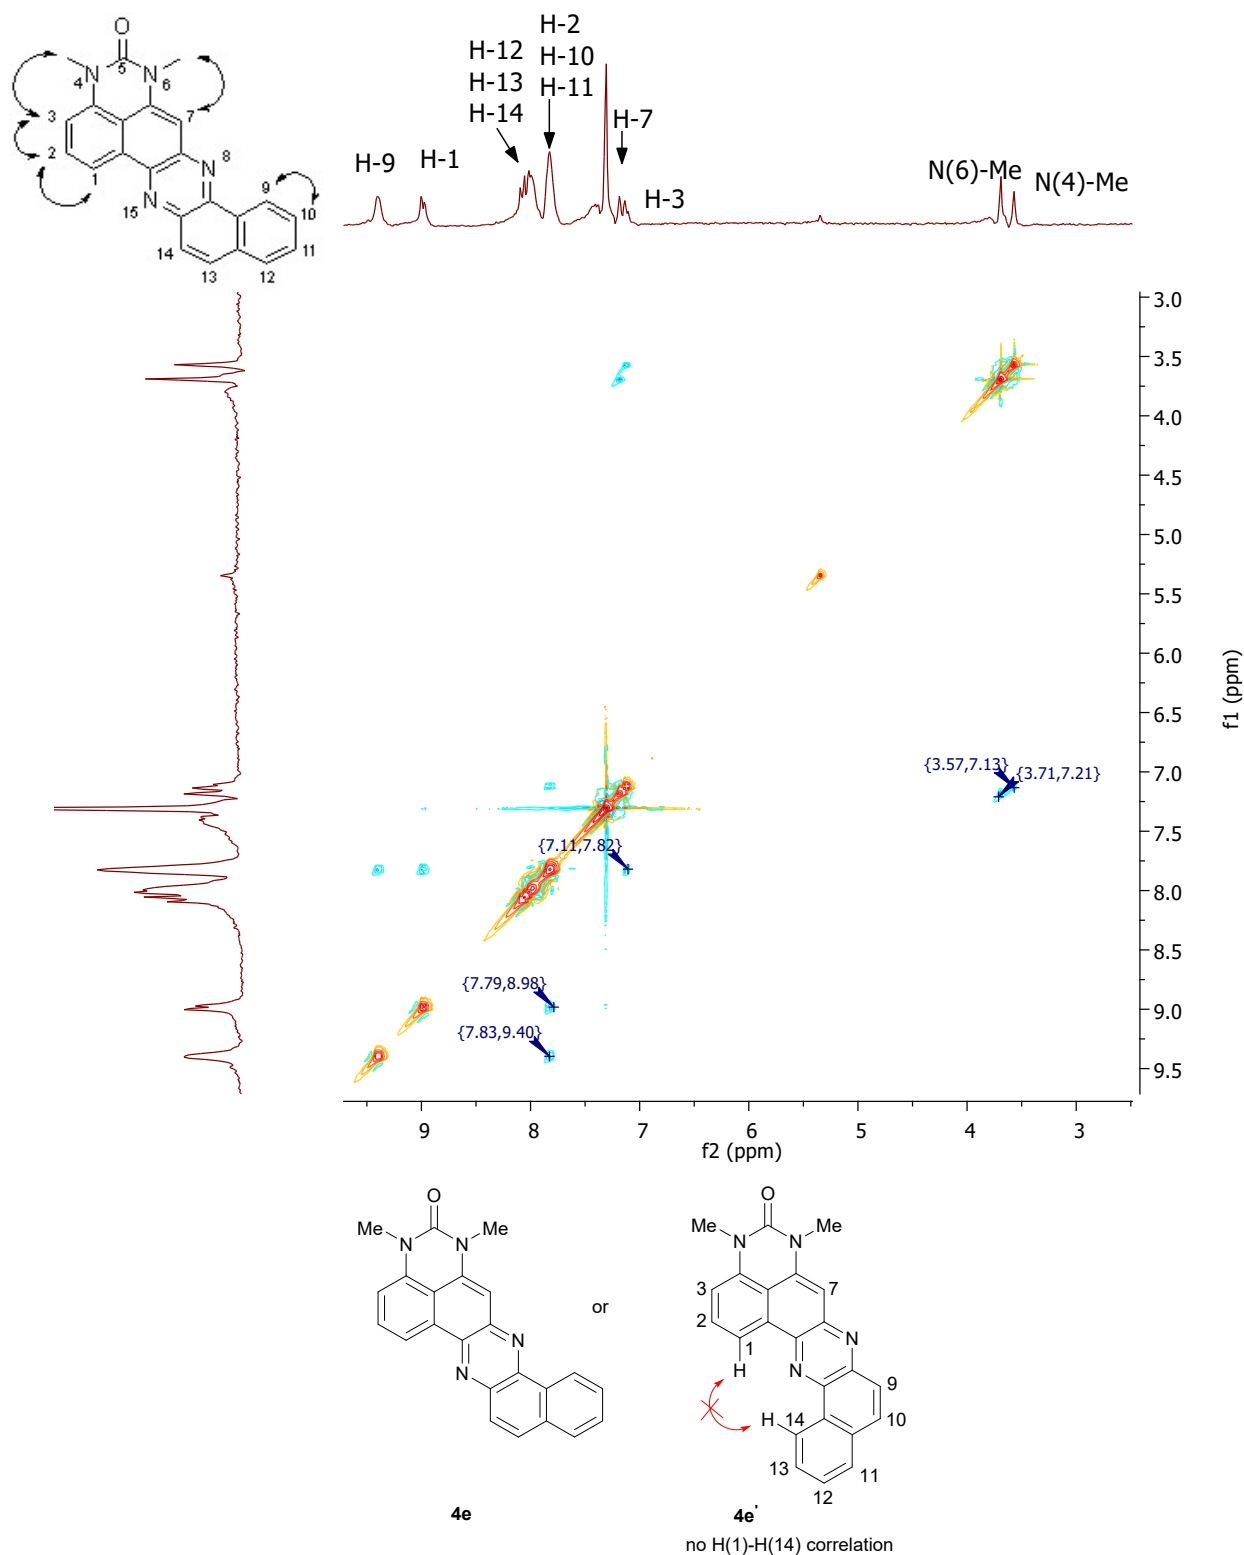

**Fig. S15.** NOESY spectrum of compound **4e** (250 MHz, CDCl<sub>3</sub>).

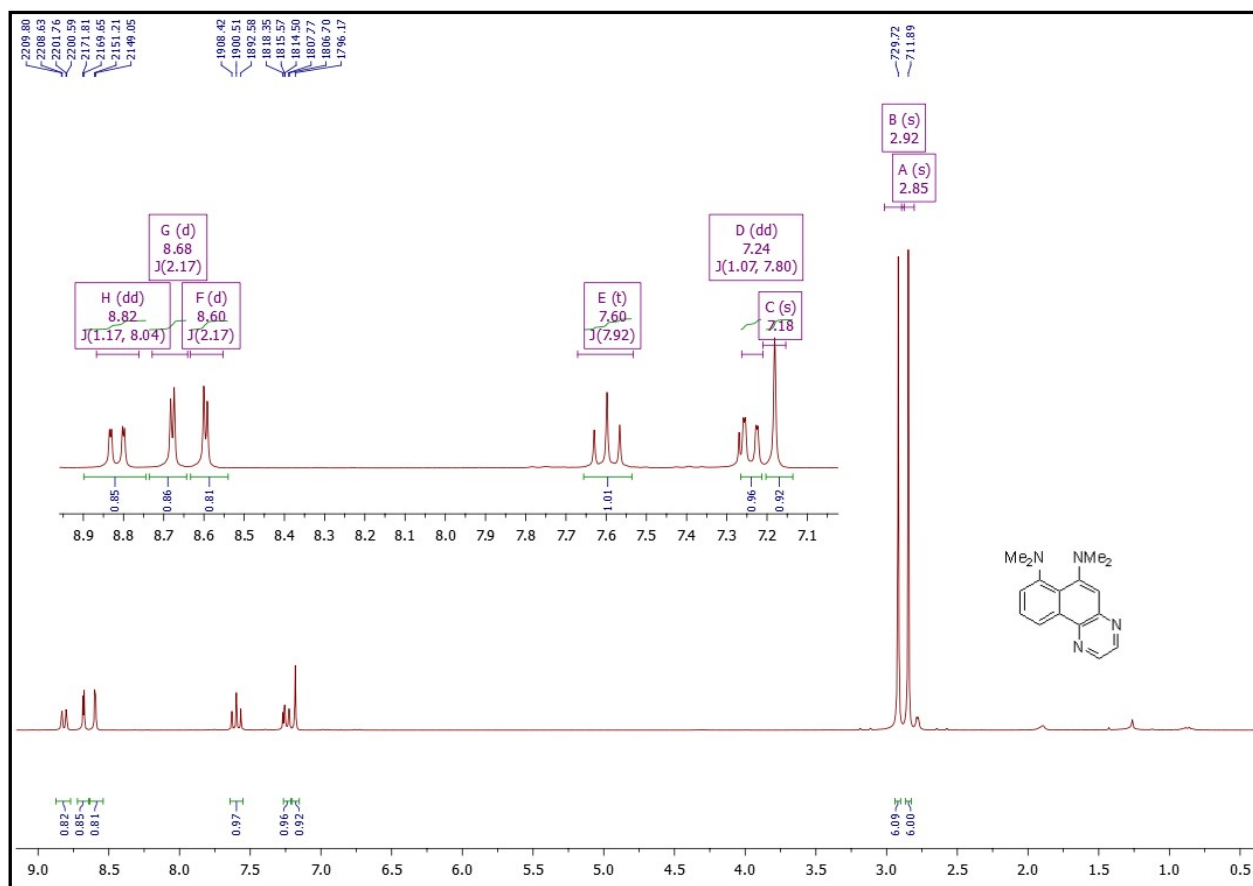

**Fig. S16.**  $^1\text{H}$  NMR spectrum of compound **9** (250 MHz,  $\text{CDCl}_3$ ).

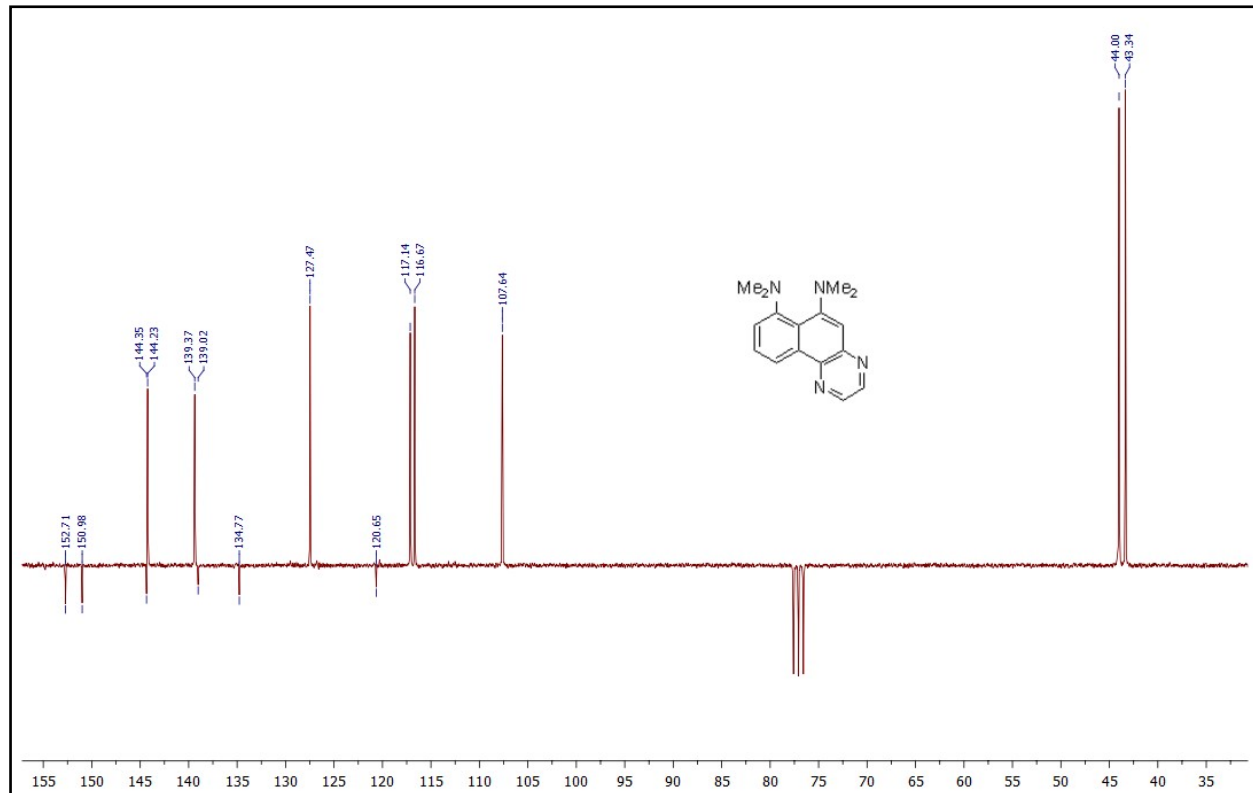

**Fig. S17.**  $^{13}\text{C}\{^1\text{H}\}$  APT-NMR spectrum of compound **9** (62.9 MHz,  $\text{CDCl}_3$ ).

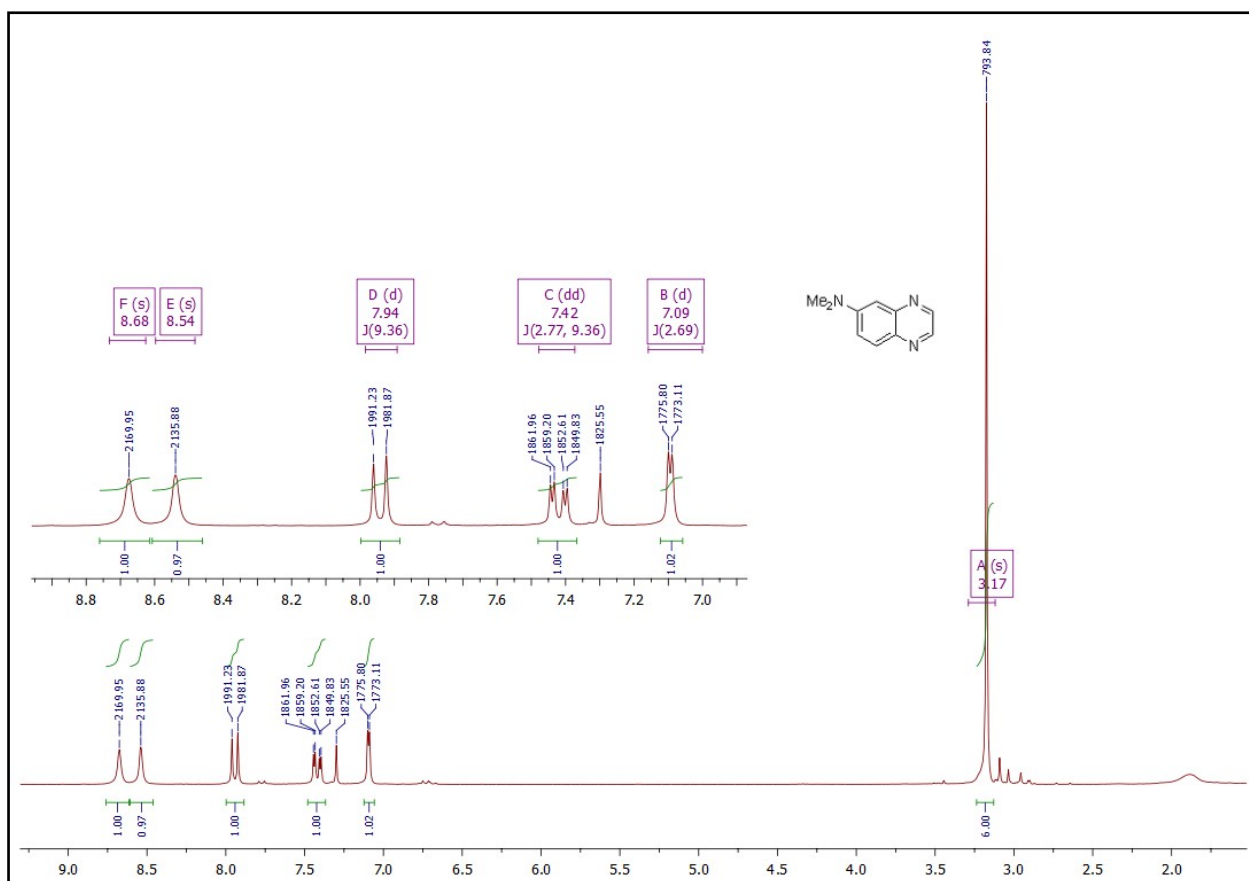

**Fig. S18.**  $^1\text{H}$  NMR spectrum of compound **10** (250 MHz,  $\text{CDCl}_3$ ).

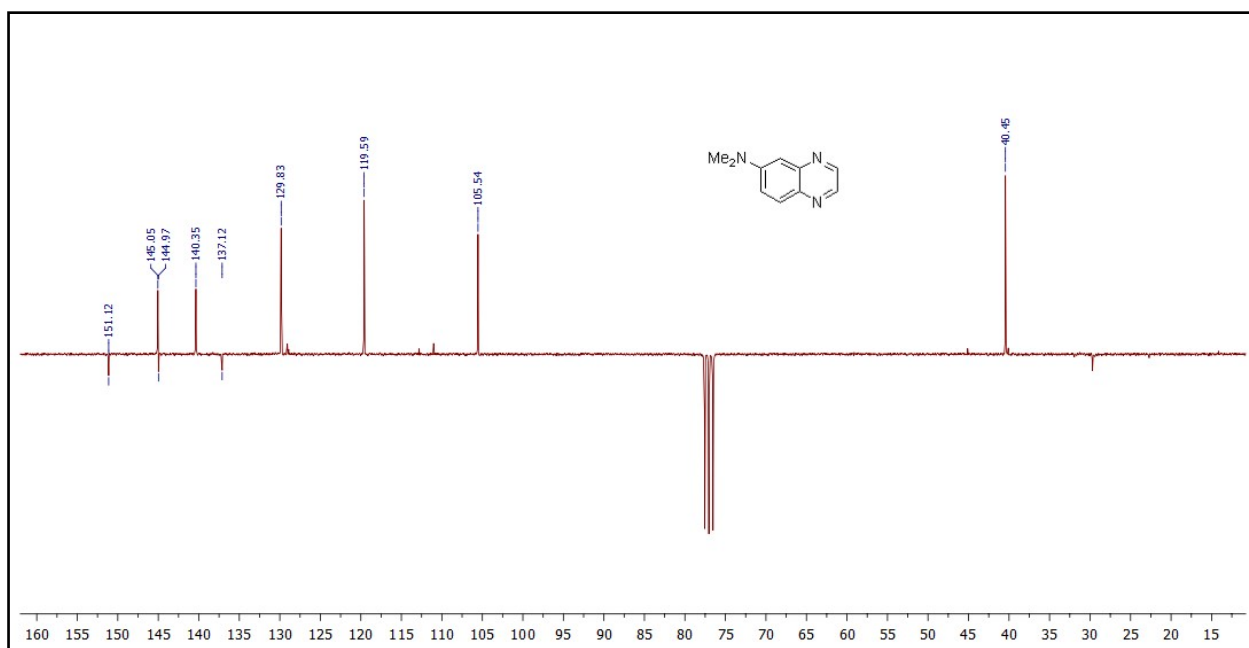

**Fig. S19.**  $^{13}\text{C}\{^1\text{H}\}$  APT-NMR spectrum of compound **10** (62.9 MHz,  $\text{CDCl}_3$ ).

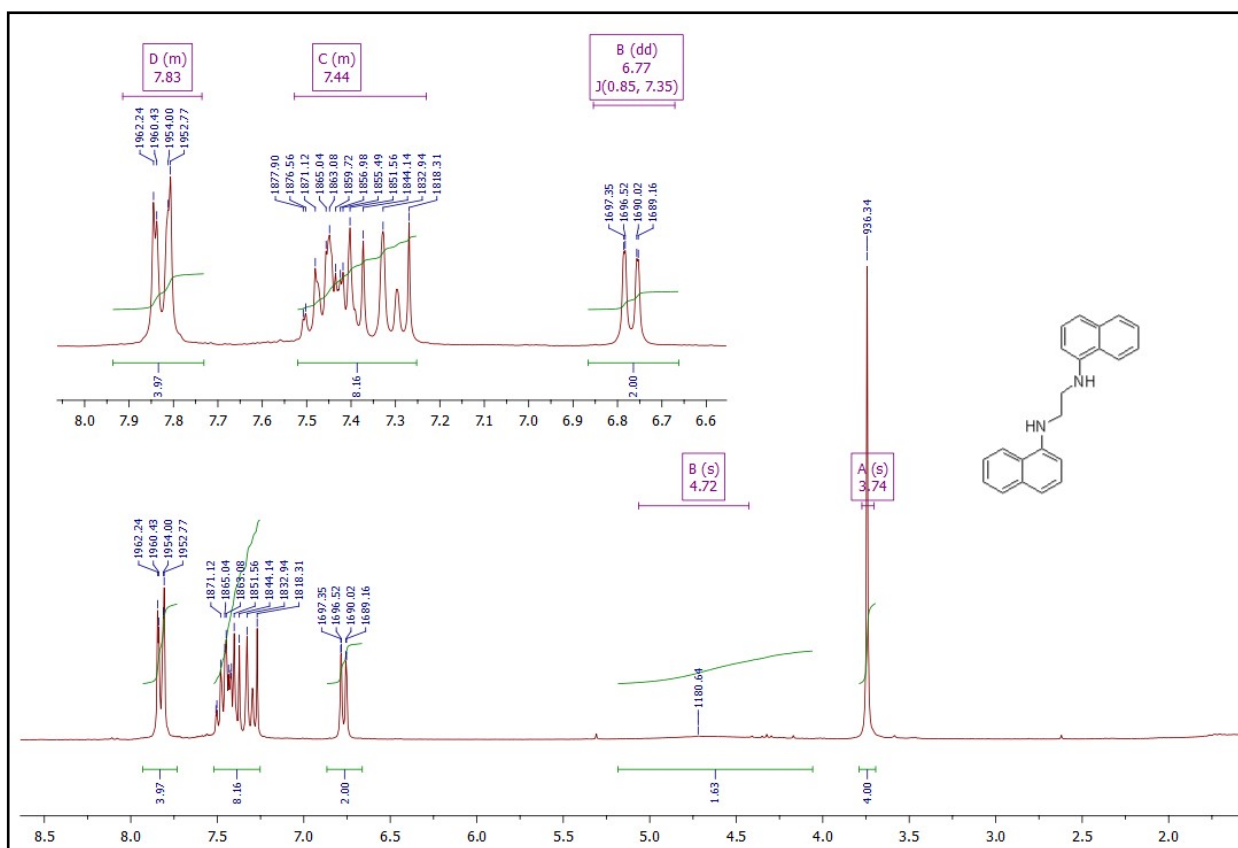

**Fig. S20.**  $^1\text{H}$  NMR spectrum of compound 13 (250 MHz,  $\text{CDCl}_3$ ).

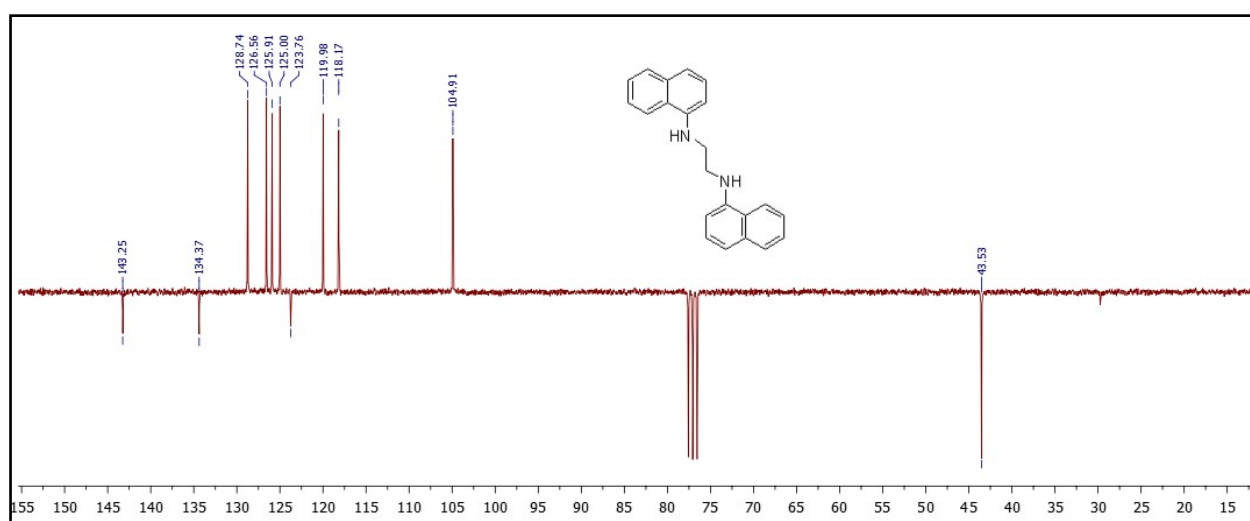

**Fig. S21.**  $^{13}\text{C}\{^1\text{H}\}$  APT-NMR spectrum of compound 13 (62.9 MHz,  $\text{CDCl}_3$ ).

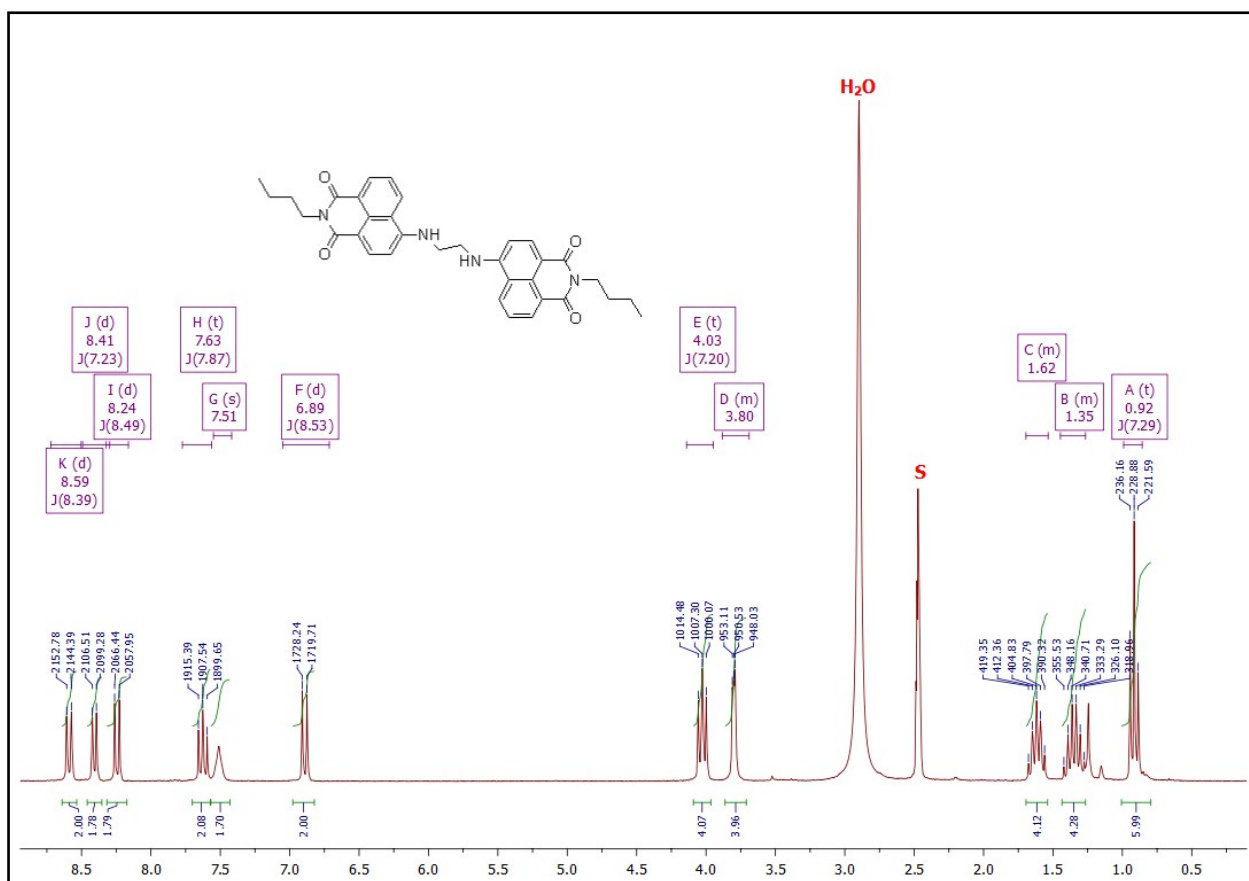

**Fig. S22.**  $^1\text{H}$  NMR spectrum of compound **14** (250 MHz,  $\text{DMSO}-d_6$ ).

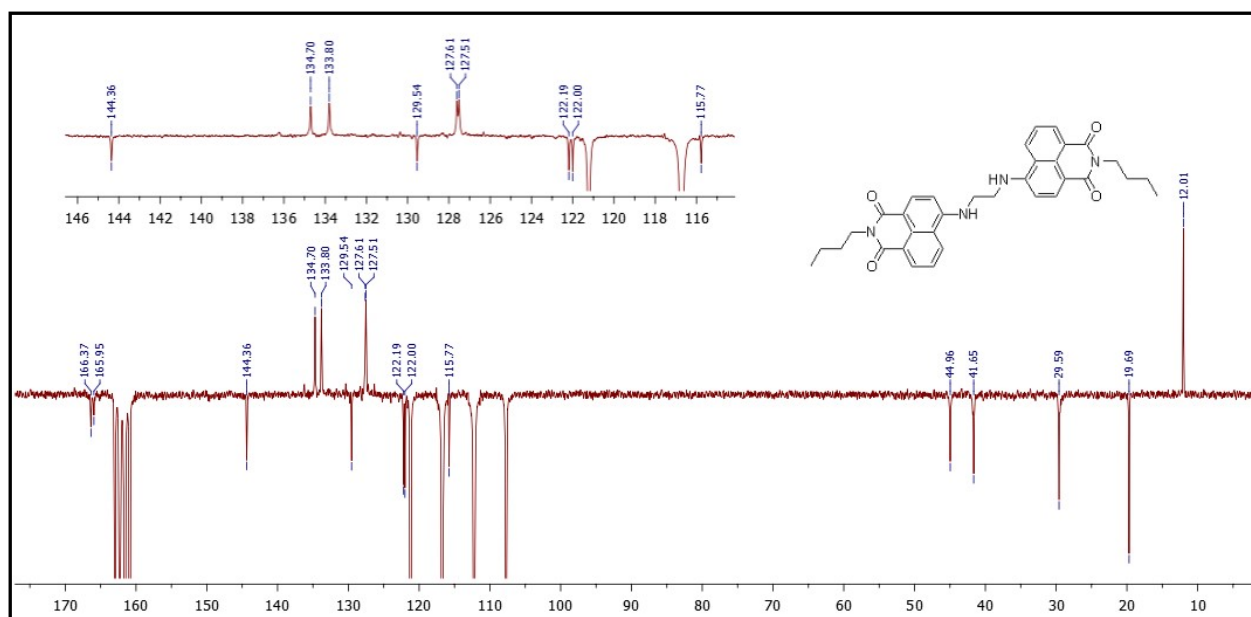

**Fig. S23.**  $^{13}\text{C}$   $\{^1\text{H}\}$  APT-NMR spectrum of compound **14** (62.9 MHz,  $\text{CF}_3\text{COOD}$ ).

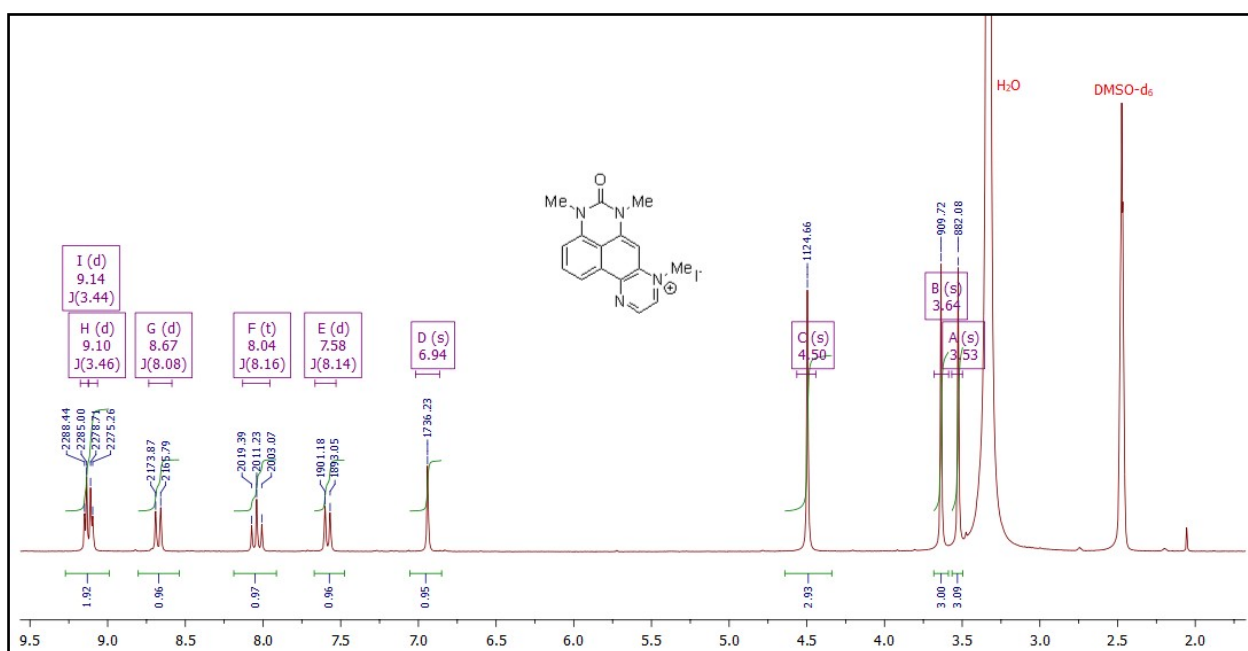

Fig. S24.  $^1\text{H}$  NMR spectrum of compound 16 (250 MHz,  $\text{DMSO-}d_6$ ).

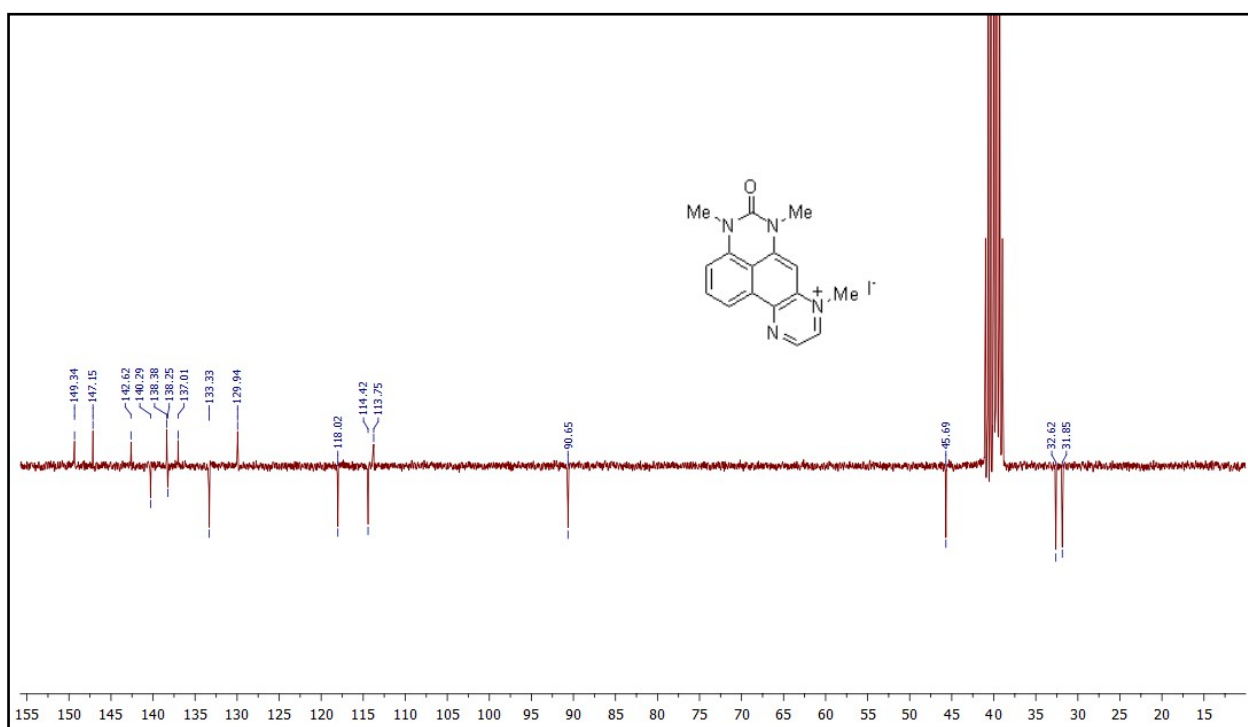

Fig. S25.  $^{13}\text{C}\{^1\text{H}\}$  APT-NMR spectrum of compound 16 (62.9 MHz,  $\text{DMSO-}d_6$ ).

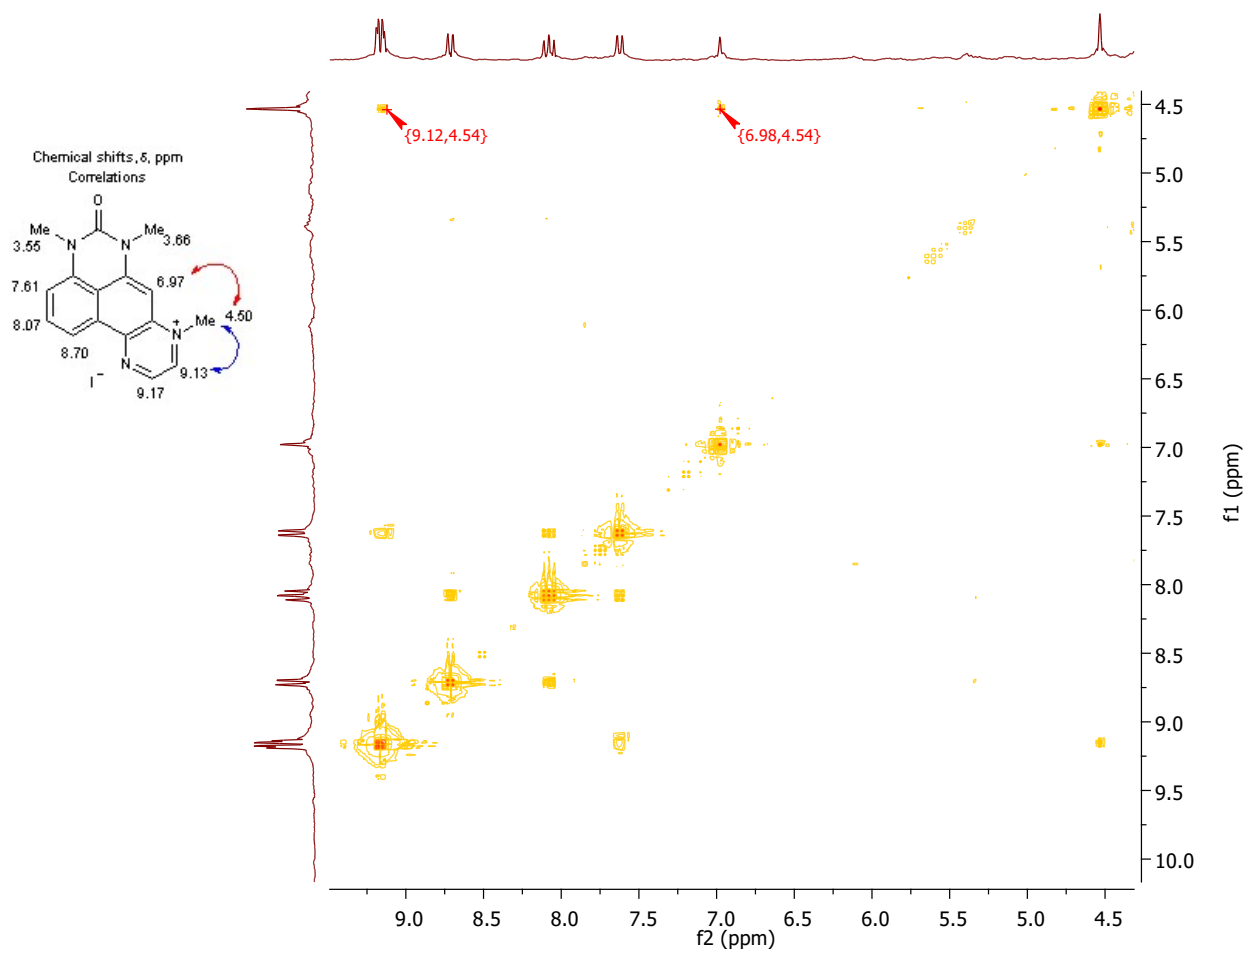

**Fig. S26.** NOESY spectrum of compound **16** (250 MHz, DMSO- $d_6$ ).

### Photophysical studies

**Emission quantum yields** were determined by relative method with a solution of anthracene in degassed EtOH as a standard ( $\Phi = 0.28$ )<sup>[8]</sup> and solutions of studied compounds in DMSO using Equation 1<sup>[9]</sup>:

$$\Phi_x = \Phi_{st} \frac{I_x}{I_{st}} \cdot \frac{f_{st}(\lambda_{ex})}{f_x(\lambda_{ex})} \cdot \frac{n_x^2(\lambda_{em})}{n_{st}^2(\lambda_{em})} = \Phi_{st} \frac{I_x}{I_{st}} \cdot \frac{(1 - 10^{-A_{st}(\lambda_{ex})})}{(1 - 10^{-A_x(\lambda_{ex})})} \cdot \frac{n_x^2(\lambda_{em})}{n_{st}^2(\lambda_{em})} \quad (\text{Eq.1}),$$

where  $I_x$  and  $I_{st}$  are the integrated emission intensities of the studied compounds and standard compound, respectively;  $f_x$  and  $f_{st}$  are their respective absorption factors from the measured absorbances ( $A$ ) at the excitation wavelength;  $n_x$  and  $n_{st}$  are the corresponding refractive indexes of the solvents used.

The X-ray structural analysis data for compound **4a** allowed us to determine **the change in dipole moment ( $\mu_E - \mu_G$ ) upon photoexcitation using the Lippert-Matagi equation 2**<sup>[10]</sup>.

$$v_A - v_E = 2\Delta f(\mu_E - \mu_G)^2/hca^3 + \text{const} \quad (\text{Eq. 2}),$$

where  $v_A - v_E$  – the Stokes shift (in  $\text{cm}^{-1}$ );

$\mu_E - \mu_G$  – the magnitude of the change in the dipole moment from the ground state to the excited state (in  $\text{cm}^{5/2} \cdot \text{g}^{1/2} \cdot \text{s}^{-1}$ , to convert to Debye (D), the value should be multiplied by  $10^{18}$ );

$h$  – the Plank's constant ( $6.626 \cdot 10^{-27} \text{ g} \cdot \text{cm}^2 \cdot \text{s}^{-1}$ );

$c$  – the velocity of light in the vacuum ( $3 \cdot 10^{10} \text{ cm} \cdot \text{s}^{-1}$ );

$a$  – the Onsager cavity radius (in cm). The radius  $a$  can be calculated using Equation 3.

$$a = (3M / 4N\pi d)^{1/3} \quad (\text{Eq. 3}),$$

where  $M$  – molecular weight,  $\text{g} \cdot \text{mol}^{-1}$ ;  $N$  – the Avogadro number;  $d$  – density of the crystals of **4a**,  $\text{g} \cdot \text{cm}^{-3}$  (from X-ray data).

$\Delta f$  – the orientation polarizability parameter of the solvent, it is determined using Equation 4

$$\Delta f = (\varepsilon - 1) / (2\varepsilon + 1) - (n^2 - 1) / (2n^2 - 1) \quad (\text{Eq. 4}),$$

where  $\varepsilon$  – the static dielectric constant of the solvent;  $n$  – the refractive index of the solvent.

The calculation results for compound **4a** in various solvents are presented in the graph (Fig. S27).

The change in dipole moment for compound **4a** was determined from the slope of the graph and amounted to  $\sim 6.3$  D.

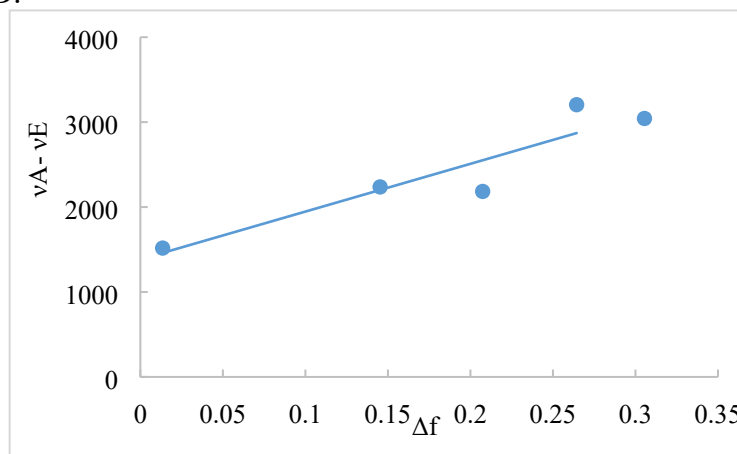

**Fig. S27.** Lippert–Mataga plot for **4a**.

**Protolytic equilibrium constant** of compounds **4a,d** was estimated in DMSO –  $\text{H}_2\text{O}$  solution (1:1, v/v) by direct fluorimetric titration as a function of  $\text{pH}$  using the fluorescence emission spectra. To adjust the  $\text{pH}$  of the solutions, 0.1 M and 1M solution of HCl, 0.1 M solution of disodium citrate and 0.1M solution of sodium hydroxide were used. To measure the  $\text{pH}$  values a  $\text{pH}$ -150M potentiometer with an indicator glass electrode and a silver–silver chloride reference

electrode was applied. The electrode was calibrated before each measurement. The acidity constant  $pK_a$  was calculated according to linear Equation 5<sup>[11]</sup>:

$$pK_a = pH + \lg \frac{F_{max} - F_i}{F_i - F_{min}} \quad (\text{Eq. 5})$$

Where  $F$  is a function of pH resulting in  $pK_a$  values and  $F_{max}$  and  $F_{min}$  are the signals at maximal and minimal  $[H^+]$ , respectively.

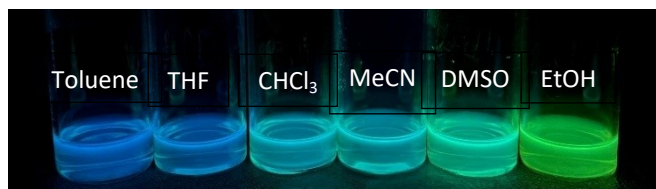

**Figure S28.** Fluorescence of compound **4a** in different solvents.

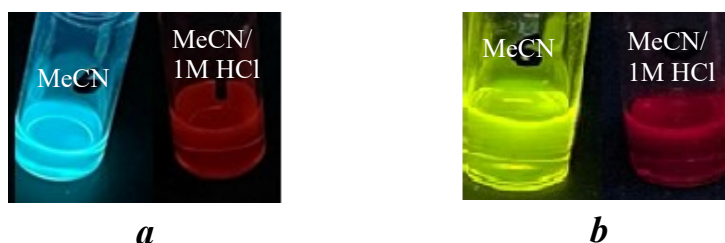

**Fig. S29.** Solutions of compounds **4a** (*a*) and **4d** (*b*) in MeCN and MeCN/1M HCl (10:1) under UV-light (365 nm).

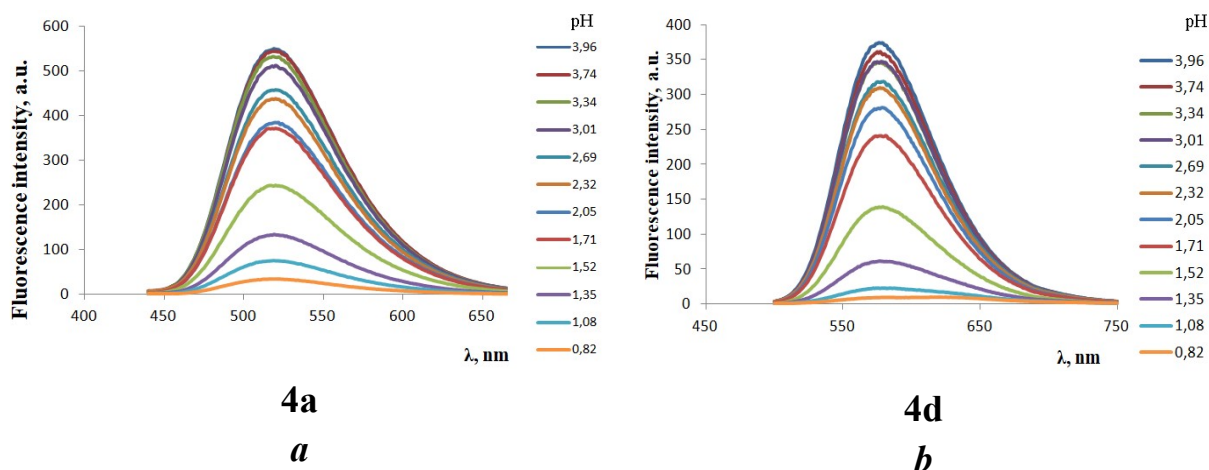

**Fig. S30.** pH-Dependent emission spectra of **4a** (*a*) and **4d** (*b*) in DMSO/H<sub>2</sub>O (1:1)

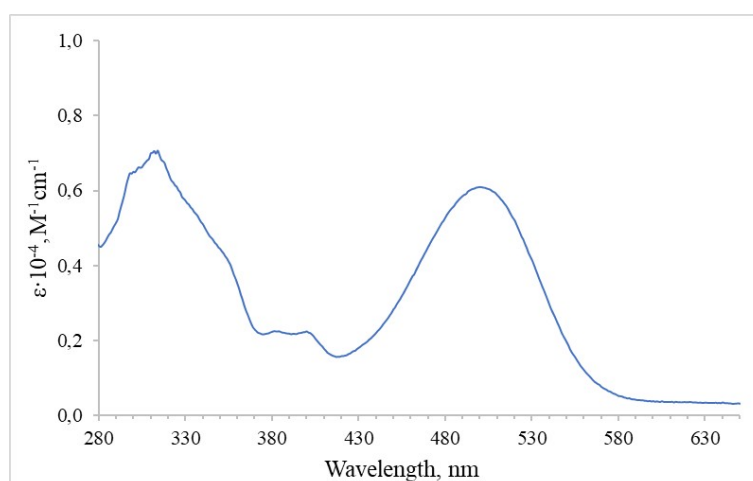

**Fig. S31.** UV/Vis absorption spectrum of salt **16** in DMSO.

### References

1. A.F. Pozharskii, N.V. Vistorobskii and V.S. Grigoryan, *Russ. J. Org. Chem.*, 1994, **30**, 985-991.
2. L.A. Kurasov, A.F. Pozharskii and V.V. Kuz'menko, *Zh. Org. Khim.*, 1981, **17**, 1944-1947 (in Russian).
3. M. Bil and J.F. Corbett, *Dyes Pigm.*, 1981, **2**, 215-217.
4. H. Takai, A. Odani and Y. Sasaki, *Chem. Pharm. Bull.*, 1978, **26**, 1672-1676.
5. C.G. Lee, J.Y. Park, Y. li Park., S.-H. Jung, G.S. Lee, J. M. Park, D.-H. Hwang and H. Kong, *J. Nanosci. Nanotechnol.*, 2019, **19**, 4782-4786.
6. G.B. Russell, G.J. Sutherland, R.D. Topsom and J. Vaughan, *J. Org. Chem.*, 1962, **27**, 4375-4377.
7. M.A. Devereux and H.B. Donahoe, *J. Org. Chem.*, 1960, **25**, 457-458.
8. K. Suzuki, A. Kobayashi, S. Kaneko, K. Takehira, T. Yoshihara, H. Ishida, Y. Shiina, S. Oishic and S. Tobita, *Phys. Chem. Chem. Phys.*, 2009, **11**, 9850-9860.
9. C. Würth, M. Grabolle, J. Pauli, M. Spieles and U. Resch-Genger, *Nature protocols*, 2013, **8**, 1535-1550.
10. W. Jiang, J. Tang, Q. Qi, W. Wu, Y. Sun and D. Fu, *Dyes Pigm.*, 2009, **80**, 11-16.
11. A. Kowalczyk, N. Boens, V. Van den Bergh and F.C. De Schryver, *J. Phys. Chem.*, 1994, **98**, 8585-8590.
